# Supplementary material for: Small RNA Profiling of Aster Yellows Phytoplasma-Infected Catharanthus roseus Plants Showing Different Symptoms
Source: Genes (Basel). 2023 May 19;14(5):1114. doi: 10.3390/genes14051114 (PMC10218541; doi:10.3390/genes14051114)
Supplement: Supplementary file 1 [file genes-14-01114-s001.zip › STables_Contaldo et al_Genes.xlsx]

## Sheet: list STables
Supporting materials to Article
Small RNA profiling of aster yellows phytoplasma infected Catharanthus roseus plants showing different symptoms
Nicoletta Contaldo1,2 Yuri Zambon1, Zsuszanna Nagyne Galbacs3, Fabio Miloro4, Zoltan Havelda 4, Assunta Bertaccini1, Eva Varallyay3*
Correspondence: varallyay.eva@uni-mate.hu (EV)
List of Supplementary Tables:
Table S1.
Initial statistics of the sequenced small RNA libraries.
Table S2.
RPM values of miRNAs in the different libraries and their average RPM in the three different groups of plants, ordered according to the miRNA families
Table S3.
z-scores of miRNAs in the three different groups of plants showing data for the detected miRNA, ordered according to the clusters shown on Figure 4.
Table S4.
Summary of the main changes in the miRNA expression of the phytoplasma infected plants.
Table S5.
z-scores of siRNAs in the three different groups of plants showing data for the detected siRNA, ordered according to the clusters shown on Figure 6.
Table S6.
Sequences of the primers used for RT-qPCR or Northern blot hybridization

## Sheet: Table S1
Table S1.
Initial statistics of the sequenced small RNA libraries.
The raw fastq files can be accessed at GEO: GSE213754
Library code	Number of sequenced reads	Number of trimmed reads	Number of reads mapped to the C. roseus genome (excluding rRNAs and tRNAs	Number of non-redundant reads
Vir1	15271147	14 489 173	11796972	3 345 028
Vir2	20 396 497	19 490 359	16248921	3 367 338
Vir3	21 829 858	21 649 878	17921855	4 053 387
WB1	27 753 307	24 183 322	20324924	5 391 478
WB2	18 668 183	17 866 383	13745857	3 523 805
WB3	14 817 681	14 416 302	11067795	3 607 908
NO1	15 966 870	15 545 052	12438410	3 921 683
NO2	25 979 498	25 188 780	19765474	3 753 889
NO3	17 891 762	17 567 516	14074641	3 544 028

## Sheet: Table S2
Table S2.
RPM values of miRNAs in the different libraries and their average RPM in the three different groups of plants, ordered according to the miRNA families
miRNA		RPM in the libraries									average RPM
		Vir1	Vir2	Vir3	WB1	WB2	WB3	NO1	NO2	NO3	Vir	WB	NO
156	ath-miR156a-5p	81.8007	101.607	47.9303	18.5979	54.2709	26.7443	85.2199	20.2373	34.8854	77.1126	33.2043	46.7809
	ath-miR156h	0.169535	0.184628	0.334787	0.0492007	0.290997	0.361409	0.321585	0	0.0710498	0.22965	0.233869	0.130878
	ath-miR156j	0.0847675	0.307713	0	0.0984014	0.145498	0.0903522	0.241188	0	0	0.130827	0.111417	0.0803961
	cro-miR156b-3p-2	6.01849	9.47755	2.28771	3.34565	6.83842	5.69219	19.8578	2.32729	6.46553	5.92792	5.29209	9.55022
	cro-miR156d-3p	10.5959	3.44638	9.70882	41.0826	12.2219	20.6907	17.9283	9.7645	13.8547	7.91705	24.665	13.8492
	cro-miR156f-3p-1	6.10326	9.78527	2.34351	3.49325	6.69293	5.51149	19.6971	2.32729	6.32343	6.07734	5.23255	9.44926
	gma-miR156e	0.0847675	0.0615425	0	0.0984014	0.218248	0	0.160792	0.252966	0	0.04877	0.10555	0.13792
	gma-miR156g	1.18675	2.40016	0.725371	0.688809	2.61897	1.53599	2.33149	0.455339	0.426299	1.43743	1.61459	1.07104
	gma-miR156k	0.932443	0.307713	0.613776	1.27922	1.23674	0.180704	8.44159	5.31229	0.213149	0.617977	0.898886	4.65568
	gma-miR156q	3.05163	6.09271	2.95728	0.688809	2.90997	1.44564	6.35129	1.56839	2.62884	4.03388	1.68147	3.51618
157	ath-miR157a-5p	506.232	494.556	508.318	693.287	399.393	615.208	735.866	338.317	496.922	503.035	569.296	523.702
	ath-miR157d	2.96686	3.81564	3.68265	3.44405	7.20217	3.52374	4.42179	4.30043	2.98409	3.48839	4.72332	3.9021
	cro-miR157d-3p	10.5959	3.3233	9.59722	40.689	12.3674	20.8714	18.0891	9.61272	13.7126	7.83882	24.6426	13.8048
159	ath-miR159a	0.423838	0.49234	0.390585	0.295204	0.436495	0.180704	0.964754	1.41661	1.49205	0.435588	0.304135	1.29114
	ath-miR159b-3p	6.18803	6.27734	7.03052	3.64085	5.45619	4.1562	6.35129	5.91941	6.46553	6.49863	4.41775	6.24541
	ath-miR159c	24.9216	19.6321	22.5423	12.743	17.8963	13.5528	16.5616	21.148	23.1622	22.3653	14.7307	20.2906
	cro-miR159a	7582.96	4249.02	6162.7	2633.47	2782	3639.21	9694.73	4964.06	7721.62	5998.23	3018.23	7460.14
	cro-miR159b	213.19	237.123	136.035	85.4616	128.621	169.772	254.132	200.754	267.858	195.45	127.951	240.915
	cro-miR159c	0.254303	0.984681	0.613776	0.0984014	0.727492	0.180704	0.562773	0.910679	0.639448	0.617586	0.335533	0.7043
	cro-miR159d	2.79733	1.23085	2.78989	1.13162	1.81873	1.62634	3.69822	2.63085	2.84199	2.27269	1.52556	3.05702
	cro-miR159e	1.78012	0.984681	1.39494	0.639609	0.581994	1.08423	2.0903	1.66958	2.41569	1.38658	0.76861	2.05852
	cro-miR159f	32.7203	20.4937	28.4011	10.3321	23.8617	15.1792	34.8115	41.5371	39.7879	27.205	16.4577	38.7122
	gma-miR159a-5p	12.6304	8.06207	10.9364	23.4687	17.8236	21.3231	27.2543	18.6689	20.3913	10.5429	20.8718	22.1048
	gma-miR159d	6.18803	3.50793	3.57106	2.55844	3.78296	2.71057	8.44159	4.19924	2.84199	4.42234	3.01732	5.16094
	sly-miR159b	0.508605	0.0615425	0.223191	0.246003	0.0727492	0.361409	0.803961	0.202373	0.568398	0.264446	0.226721	0.524911
160	cro-miR160h	0.593373	0.553883	0.50218	0.147602	0.363746	0.271057	3.69822	0.354153	0.284199	0.549812	0.260802	1.44552
162	cro-miR162-3p	2.8821	2.83096	4.68701	3.34565	5.60169	4.06585	2.97466	4.80636	6.39448	3.46669	4.33773	4.72517
	cro-miR162a-3p	126.473	71.3278	136.649	132.251	120.982	110.862	117.78	172.978	262.245	111.483	121.365	184.334
	cro-miR162a-5p-1	0.33907	0.123085	0.390585	0.590408	0.654743	0.361409	0.723565	0.708306	0.639448	0.284247	0.53552	0.69044
	cro-miR162a-5p-2	0.254303	0.184628	0.390585	0.688809	0.581994	0.361409	0.723565	0.809492	0.639448	0.276505	0.544071	0.724168
	cro-miR162b	0.169535	0.0615425	0	0	0	0.271057	0.0803961	0.101187	0.0710498	0.0770259	0.0903522	0.0842108
	cro-miR162c	1.27151	1.35394	1.72973	1.13162	2.03698	1.80704	1.20594	1.16365	2.06044	1.45173	1.65855	1.47668
	cro-miR162d	0	0.0615425	0.334787	0.344405	0.290997	0	0.160792	0.404746	0.213149	0.13211	0.211801	0.259563
164	cro-miR164a	0.0847675	0.0615425	0.278989	0	0	0	0.241188	0.505933	0.355249	0.141766	0	0.367457
	cro-miR164e-5p	0.254303	0.184628	0.278989	0.0492007	0	0.0903522	0.241188	0.556526	0.568398	0.239306	0.0465176	0.455371
165	ath-miR165a-3p	0.0847675	0.0615425	0.0557978	0	0	0	0.0803961	0.354153	0.1421	0.0673693	0	0.192216
	cro-miR165a-3p-1	36.1957	4.00027	9.20664	3.29645	58.7813	3.43338	4.26099	94.1035	15.702	16.4675	21.8371	38.0222
	cro-miR165a-3p-2	116.471	33.1099	112.991	19.5819	311.076	23.2205	32.8016	314.791	142.171	87.5237	117.959	163.255
	cro-miR165a-5p	0.762908	1.16931	1.56234	0.934813	2.25522	1.17458	1.68832	0.809492	1.06575	1.16485	1.45487	1.18785
166	ath-miR166a-3p	10.6807	4.49261	10.0436	3.83765	31.8641	4.60796	4.50218	53.1229	17.123	8.40564	13.4366	24.916
	ath-miR166e-5p	5.25559	5.16957	2.6225	3.88685	5.38344	5.96325	4.66298	2.52966	2.62884	4.34922	5.07785	3.27383
	cro-miR166	86981.1	23346.2	67060	24669.7	50271.4	32315	48778.7	39797.2	59762	59129.1	35752.1	49446
	cro-miR166a	744.937	353.747	639.275	322.166	666.237	358.608	284.924	387.696	478.946	579.32	449.004	383.856
	cro-miR166b	756.635	360.147	652.22	326.151	673.876	366.378	291.275	398.979	487.188	589.667	455.468	392.481
	cro-miR166b-5p	3.1364	5.23112	1.84133	3.29645	6.18368	6.2343	3.69822	0.758899	1.06575	3.40295	5.23814	1.84096
	cro-miR166c	71.2047	17.6627	52.8405	22.3863	84.6801	22.5881	36.2587	98.3533	61.9554	47.236	43.2181	65.5225
	cro-miR166d-5p	9.6635	11.6315	7.25371	19.4343	25.1712	24.9372	14.7929	12.4459	8.66807	9.51625	23.1809	11.969
	cro-miR166e-3p-1	1336.28	709.893	1355.66	732.746	1443.85	1017.64	835.396	1299.08	1181.56	1133.94	1064.75	1105.35
	cro-miR166e-3p-2	29.7534	7.63128	26.0018	10.6273	22.043	11.6554	16.4008	23.5259	23.5885	21.1288	14.7753	21.1717
	cro-miR166h-3p	111781	72886.5	145893	64578	105723	96849.7	94734.9	122814	114493	110187	89050.1	110681
	cro-miR166h-5p	17.8012	17.4165	17.4089	14.219	13.7496	35.5988	14.7929	19.1243	15.773	17.5422	21.1891	16.5634
	cro-miR166i	70.8656	49.6033	65.674	18.2535	66.7838	31.804	38.2686	73.765	42.2746	62.0476	38.9471	51.4361
	cro-miR166j-3p	740.868	352.639	636.597	320.69	664.491	356.891	282.834	385.622	476.815	576.701	447.357	381.757
	cro-miR166m	746.717	355.777	642.009	322.461	668.129	359.783	287.497	390.479	481.717	581.501	450.124	386.564
	cro-miR166T	237.942	156.441	248.021	104.551	248.438	191.637	152.672	180.618	181.674	214.135	181.542	171.655
	gma-miR166a-5p	1.78012	0.553883	0.278989	1.32842	3.63746	1.08423	0	0.758899	0.213149	0.870997	2.0167	0.324016
	gma-miR166h-3p	41.7056	29.6635	50.9992	27.5524	41.467	28.0995	15.2753	44.9774	29.983	40.7894	32.373	30.0786
	gma-miR166i-5p	11.2741	7.07739	4.29643	31.882	27.6447	17.6187	3.21585	4.30043	3.19724	7.5493	25.7151	3.57117
	gma-miR166m	1.18675	0.369255	1.06016	0.246003	0.87299	0.542113	0.803961	0.505933	0.355249	0.872053	0.553702	0.555048
	gma-miR166p	10.2569	5.3542	9.82041	5.80568	9.23915	5.42113	3.77862	9.56213	8.88122	8.47716	6.82199	7.40732
	gma-miR166u	2.28872	1.10777	2.17611	1.37762	2.18248	1.26493	1.04515	2.42848	1.98939	1.85753	1.60834	1.82101
	sly-miR166c-3p	16.6992	10.5853	15.7908	5.06767	9.89389	8.76417	8.03961	14.4697	11.2259	14.3584	7.90858	11.2451
167	ath-miR167a-5p	24.2435	11.3854	11.5501	59.8772	6.91117	20.9617	26.0483	41.0311	53.0742	15.7263	29.25	40.0512
	ath-miR167d	26.7018	31.6944	20.2546	27.4048	12.7311	39.2129	93.6615	23.3235	32.1855	26.2169	26.4496	49.7235
	cro-miR167b-3p-1	1.01721	1.29239	1.56234	0.541207	0.87299	1.62634	3.37664	3.44034	2.06044	1.29065	1.01351	2.95914
	cro-miR167b-3p-2	0.593373	0.24617	0.390585	0.344405	0.290997	1.17458	1.60792	0.15178	0.355249	0.410042	0.603327	0.704984
	cro-miR167d-3p	1.01721	0.430798	0.669574	1.13162	0.87299	2.43951	1.60792	0.455339	0.781547	0.705861	1.48137	0.94827
	gma-miR167c	2.62779	3.69255	2.84569	1.82043	2.18248	4.87902	2.81386	1.5178	2.77094	3.05534	2.96064	2.36753
	gma-miR167e	0.169535	0.184628	0.223191	0.344405	0.290997	0.180704	0.803961	0.202373	0.426299	0.192451	0.272035	0.477544
	gma-miR167g	0.0847675	0.369255	0	0.196803	0.218248	0	0.160792	0.0505933	0.0710498	0.151341	0.13835	0.0941451
	gma-miR167l	4.66221	1.72319	2.67829	7.3801	3.20096	4.51761	6.35129	6.47594	8.52597	3.02123	5.03289	7.11774
168	ath-miR168a-3p	0.0847675	0	0.167393	0.0984014	0	0.0903522	0	0.0505933	0.1421	0.0840536	0.0629179	0.0642309
	ath-miR168a-5p	411.122	251.955	291.32	562.069	312.676	779.017	819.317	1254.97	1197.33	318.133	551.254	1090.54
	cro-miR168a-3p-1	13.8171	6.27734	8.76025	14.219	14.1861	20.6907	50.0064	14.1661	34.1039	9.61823	16.3652	32.7588
	gma-miR168b	12.7151	11.9393	11.1038	15.7934	22.916	32.6172	33.7664	18.163	26.7147	11.9194	23.7755	26.2147
	sly-miR168a-5p	0.593373	0.984681	0.446382	0.393605	0.727492	0.180704	0.723565	0.455339	0.213149	0.674812	0.433934	0.464018
169	ath-miR169a-3p	0.847675	0.184628	0.223191	1.32842	1.09124	1.08423	1.76871	0.30356	0.994697	0.418498	1.16796	1.02232
	ath-miR169h	0.33907	0.24617	0.223191	0.344405	1.30949	0.361409	1.60792	0.607119	2.48674	0.269477	0.671766	1.56726
170	cro-miR170-3p	0.762908	0.307713	0.446382	0.541207	0.509244	0.632466	1.28634	0.505933	0.497348	0.505668	0.560972	0.763206
	cro-miR170-5p	10.0026	10.2161	10.8806	12.3494	9.96664	13.5528	19.6167	13.6602	25.0095	10.3664	11.9563	19.4288
171	cro-miR171a	0.593373	0.307713	0.390585	0.541207	0.436495	0.632466	1.20594	0.455339	0.426299	0.430557	0.536723	0.69586
	cro-miR171b	0.33907	0.0615425	0.111596	0.0492007	0	0.0903522	0.321585	0.0505933	0.213149	0.170736	0.0465176	0.195109
	cro-miR171b-3p-1	1.86489	1.53856	1.67393	2.80444	0.581994	1.17458	2.49228	1.72017	0.710498	1.69246	1.52034	1.64098
	cro-miR171b-3p-2	0.0847675	0.184628	0.111596	0.0492007	0	0.0903522	0.0803961	0.101187	0.1421	0.126997	0.0465176	0.107894
	cro-miR171c-3p	0.67814	0.307713	0.390585	0.541207	0.363746	0.632466	1.12555	0.404746	0.497348	0.458812	0.512473	0.67588
	cro-miR171c-5p	1.10198	13.8471	11.6617	0.73801	5.38344	0.451761	0.884357	0.354153	0	8.87026	2.19107	0.412837
	cro-miR171e	0.33907	0.430798	0.111596	0.196803	0	0.180704	0.562773	0.0505933	0.213149	0.293821	0.125836	0.275505
	cro-miR171f	0.593373	0.307713	0.390585	0.541207	0.363746	0.632466	1.20594	0.404746	0.426299	0.430557	0.512473	0.678996
	cro-miR171f-3p	0	0.123085	0.111596	0.0492007	0.0727492	0.0903522	0.160792	0.15178	0.0710498	0.0782269	0.0707674	0.127874
	cro-miR171g	1.01721	0.49234	0.50218	0.688809	0.581994	0.993875	1.20594	0.455339	0.497348	0.670577	0.754893	0.719543
	cro-miR171h	0.423838	0.49234	0.50218	0.147602	0.363746	0.542113	0.241188	0.30356	0.0710498	0.472786	0.351154	0.205266
172	ath-miR172a	0.169535	0.184628	0.334787	0.442806	0.654743	0.180704	0.401981	0.354153	0.355249	0.22965	0.426084	0.370461
	cro-miR172b-5p	0.508605	0.123085	0.223191	1.13162	0.145498	0.632466	0.160792	0.101187	0.426299	0.28496	0.636527	0.229426
	cro-miR172g-3p	39.2474	12.5547	5.63558	43.3458	15.6411	27.9188	11.8182	4.90755	3.62354	19.1459	28.9686	6.78311
	cro-miR172h-5p	0.423838	0.0615425	0.223191	1.08241	0.145498	0.632466	0.0803961	0.0505933	0.355249	0.23619	0.620126	0.162079
	gma-miR172b-5p	0.847675	0.615425	0.557978	0.836411	1.30949	1.62634	0.964754	0.30356	0.213149	0.673693	1.25741	0.493821
319	ath-miR319a	0.169535	0.0615425	0.613776	0.0492007	0.290997	0.0903522	0.241188	0.354153	0	0.281618	0.143517	0.198447
	ath-miR319c	1.10198	0.800053	1.11596	0.885612	0.727492	0.722818	0.884357	0.910679	1.20785	1.006	0.778641	1.00096
	cro-miR319	6.01849	5.23112	4.35223	2.06643	4.65595	6.50536	11.4966	9.0562	1.77624	5.20061	4.40925	7.44303
	cro-miR319a	46.8764	40.0027	66.511	6.00248	28.4449	20.1485	58.2872	53.6289	4.26299	51.13	18.1987	38.7263
	cro-miR319a-3p	27.4647	26.9556	16.4046	4.92007	15.7866	13.2818	32.882	6.88068	2.91304	23.6083	11.3295	14.2252
	cro-miR319b	1.52582	1.60011	1.22755	0.541207	0.800241	1.26493	2.25109	0.809492	0.355249	1.45116	0.868793	1.13861
	cro-miR319d	1.27151	1.16931	0.781169	0.492007	0.654743	1.17458	2.0099	0.556526	0.355249	1.074	0.773776	0.973893
	cro-miR319e	77.5623	143.579	71.9234	38.9177	90.4272	77.5222	101.942	104.526	43.5535	97.6881	68.9557	83.3405
	cro-miR319f	0.67814	0.738511	0.725371	0.196803	0.363746	0.451761	1.04515	0.607119	0.1421	0.714007	0.337437	0.598123
	cro-miR319g	27.1256	26.771	16.293	4.92007	15.5683	12.9204	32.48	6.7795	2.77094	23.3965	11.1363	14.0102
	gma-miR319g	0	0.24617	0.111596	0.196803	0	0.180704	0.160792	0	0	0.119255	0.125836	0.0535974
390	cro-miR390a-3p-1	10.0873	0.307713	1.45074	26.3224	0.436495	19.245	39.2333	19.3772	24.8674	3.9486	15.3346	27.826
	cro-miR390a-3p-2	9.9178	0.184628	1.39494	25.3875	0.363746	18.6126	39.0725	17.6571	24.4411	3.83246	14.788	27.0569
	cro-miR390a-5p	10.0026	4.18489	4.74281	10.3813	4.21945	12.9204	26.7719	19.5796	14.7784	6.31009	9.17372	20.3766
	cro-miR390c-5p	0.254303	0	0.278989	0.196803	0.145498	0.451761	0.562773	0.252966	0.355249	0.177764	0.264687	0.390329
	cro-miR390e	0.254303	0	0.334787	0.147602	0.218248	0.361409	0.643169	0.354153	0.213149	0.196363	0.24242	0.40349
391	gma-miR391-5p	22.0396	5.41574	6.69574	37.1957	10.6214	28.1899	42.5296	19.9843	20.4623	11.3837	25.3357	27.6587
393	ath-miR393a-5p	0.593373	0.923138	0.50218	0.73801	0.436495	0.722818	1.20594	0.657713	1.1368	0.672897	0.632441	1.00015
	cro-miR393a	11.6131	5.84654	8.81605	5.06767	6.32918	5.8729	13.4262	5.31229	9.16542	8.75858	5.75658	9.30129
	cro-miR393a-3p	7.20524	3.13867	5.52398	2.95204	5.23794	8.1317	11.8182	3.84509	4.61824	5.2893	5.44056	6.76052
	cro-miR393a-5p	11.9522	7.13894	9.48563	6.19929	8.14791	7.13783	16.24	6.07119	10.5864	9.52559	7.16167	10.9659
	cro-miR393b-5p	76.5451	45.2338	70.5842	58.1552	52.9614	57.8254	98.8872	54.5395	81.423	64.121	56.314	78.2833
394	cro-miR394a	4.15361	8.92367	2.39931	1.72202	2.83722	2.71057	12.7026	0.758899	0.852597	5.15886	2.42327	4.77136
	gma-miR394b-3p	0.33907	0.369255	0.50218	0.196803	0.363746	0.632466	0.241188	0	0.284199	0.403502	0.397671	0.175129
395	cro-miR395a	17.3773	20.0629	0.446382	0.344405	1.16399	2.62021	0.482377	0.101187	0.355249	12.6289	1.3762	0.312937
	cro-miR395b	1.35628	0.123085	0	0	0.0727492	0	0	0	0	0.493122	0.0242497	0
	cro-miR395d	17.0383	20.186	0.278989	0.344405	1.23674	2.25881	0.321585	0.0505933	0.284199	12.5011	1.27998	0.218792
	cro-miR395e-5p	0.508605	1.53856	0.0557978	0.0984014	0.145498	0.0903522	0	0	0	0.700989	0.111417	0
396	ath-miR396a-3p	0.67814	0.800053	0.390585	1.03321	0.145498	0.903522	1.36673	0.961272	1.1368	0.622926	0.694078	1.15493
	ath-miR396b-3p	0.169535	0	0	0.196803	0	0.0903522	0.0803961	0	0	0.0565117	0.0957183	0.0267987
	ath-miR396b-5p	0.762908	0.0615425	0.334787	0.196803	0.218248	0.0903522	0.562773	0.505933	0.497348	0.386412	0.168468	0.522018
	cro-miR396-3p-1	0.33907	0.123085	0.50218	0.147602	0.218248	0.180704	0.0803961	0.354153	0.497348	0.321445	0.182185	0.310632
	cro-miR396-3p-2	1.35628	0.123085	0.892765	1.47602	1.09124	2.0781	1.04515	1.26483	1.77624	0.79071	1.54845	1.36208
	cro-miR396a	5.25559	7.32356	9.70882	2.31243	4.65595	3.43338	6.75327	8.60086	12.4337	7.42932	3.46725	9.26261
	cro-miR396a-3p-1	114.436	81.0515	112.544	75.9658	68.0932	122.156	126.061	72.146	126.966	102.677	88.7384	108.391
	cro-miR396a-3p-2	0	0.184628	0.334787	0	0.0727492	0	0.160792	0.0505933	0.355249	0.173138	0.0242497	0.188878
	cro-miR396a-3p-3	54.1664	48.0647	70.8632	25.732	36.0109	49.513	52.981	29.9512	60.0371	57.6981	37.0853	47.6564
	cro-miR396a-3p-4	0.593373	0.676968	0.725371	0.541207	0.581994	1.26493	0.964754	0.607119	0.710498	0.665237	0.796044	0.76079
	cro-miR396a-5p	2098.76	4326.81	5969.02	959.364	1737.25	1256.8	2205.83	4120.72	5946.51	4131.53	1317.8	4091.02
	cro-miR396b	13.9019	10.0314	17.8553	4.77247	10.9124	7.951	19.2951	15.9875	23.7306	13.9295	7.87861	19.6711
	cro-miR396b-3p-1	1.69535	0.369255	0.948563	1.57442	1.23674	2.43951	1.12555	1.61898	1.77624	1.00439	1.75022	1.50692
	cro-miR396b-3p-2	2.20396	0.800053	1.61814	2.21403	1.89148	3.25268	2.33149	1.92254	2.34464	1.54071	2.45273	2.19956
	cro-miR396b-5p	1466.99	532.651	1862.98	378.747	850.875	569.309	1119.36	1273.53	1457.23	1287.54	599.644	1283.37
	cro-miR396c	23.6501	5.53883	15.2886	15.0554	14.2588	24.124	17.2048	8.2973	17.123	14.8259	17.8128	14.2084
	cro-miR396d	4.06884	3.81564	7.4769	2.16483	3.92846	2.25881	5.30614	7.74077	9.09437	5.12046	2.78403	7.38043
	cro-miR396e	2105.2	4329.95	5977.95	962.021	1741.18	1260.23	2214.27	4128.36	5955.53	4137.7	1321.14	4099.39
	cro-miR396f	1.44105	3.44638	4.966	0.787211	3.12822	0.632466	1.28634	5.76763	4.97348	3.28448	1.51596	4.00915
	cro-miR396g	16.1058	12.0008	21.5379	5.65808	12.0036	8.85452	21.305	19.4784	26.9279	16.5482	8.83874	22.5704
	cro-miR396g-3p	2.11919	2.52324	3.40367	1.27922	1.81873	1.44564	3.21585	5.00873	6.25238	2.68203	1.51453	4.82565
	cro-miR396g-5p-1	0.593373	0.24617	0.725371	0.0984014	0.145498	0.0903522	0.482377	0.202373	0.568398	0.521638	0.111417	0.417716
	cro-miR396g-5p-2	2.54303	0.923138	2.28771	2.85364	1.74598	3.16233	2.1707	2.07432	5.18663	1.91796	2.58732	3.14388
	cro-miR396h	1564.38	3548.36	4762.23	460.272	1009.18	788.052	1148.22	1530.55	2660.67	3291.66	752.5	1779.81
397	cro-miR397a	112.402	219.399	70.1936	106.224	174.962	132.366	70.1054	55.2479	121.708	133.998	137.851	82.3538
	cro-miR397b	0.254303	0.861596	0.223191	0.147602	3.05547	0.271057	0.0803961	0.910679	1.34995	0.446363	1.15804	0.78034
	cro-miR397c	0	0.184628	0	0.0492007	1.09124	0	0.0803961	0.101187	0.0710498	0.0615425	0.380146	0.0842108
	cro-miR397d	0.932443	1.35394	0.446382	0.541207	1.23674	1.08423	0.643169	0.15178	0.781547	0.91092	0.954057	0.525499
	cro-miR397e	1.52582	2.21553	0.725371	1.57442	5.23794	2.98162	1.68832	1.26483	2.77094	1.48891	3.26466	1.90803
	cro-miR397f	0.254303	0.184628	0.167393	0.246003	1.52773	0.542113	0.321585	0.202373	1.34995	0.202108	0.77195	0.624634
	cro-miR397g	0.0847675	0.123085	0	0	0.145498	0.0903522	0	0.0505933	0.1421	0.0692842	0.0786169	0.0642309
	cro-miR397h	1.69535	3.44638	1.50654	2.50923	4.65595	3.34303	2.0099	1.01187	2.27359	2.21609	3.50274	1.76512
398	ath-miR398a-3p	0.33907	0.123085	0.0557978	0.0492007	0.0727492	0.0903522	0.160792	0	0	0.172651	0.0707674	0.0535974
	ath-miR398b-3p	0	0.0615425	0.167393	0	1.30949	0	0.0803961	0.0505933	0.1421	0.076312	0.436495	0.0910296
	cro-miR398	1281.43	1725.78	843.16	223.715	2054.07	652.976	434.621	296.173	356.101	1283.46	976.922	362.299
	cro-miR398a-3p-1	1285.75	1732.42	845.448	224.65	2075.68	654.873	436.471	298.551	358.02	1287.87	985.068	364.347
	cro-miR398a-3p-2	1333.31	1779.07	866.763	234.392	2149.3	678.907	461.474	307.708	369.672	1326.38	1020.87	379.618
	cro-miR398f	1299.15	1752.98	853.371	226.815	2095.69	662.643	441.938	301.384	362.496	1301.83	995.048	368.606
	gma-miR398c	3.72977	4.67723	2.28771	2.01723	6.40193	2.43951	1.28634	0.961272	1.91834	3.5649	3.61956	1.38865
	sly-miR398a	0.593373	0.800053	0.278989	0.295204	1.09124	0.361409	0.321585	0.202373	0.284199	0.557472	0.582617	0.269386
399	cro-miR399b	282.869	27.3864	50.4412	145.486	21.17	100.02	117.62	19.529	24.4411	120.232	88.8921	53.8632
	cro-miR399d	1.35628	0.0615425	0.167393	0.885612	0.145498	0.81317	1.44713	0.101187	0.1421	0.528405	0.61476	0.563472
	cro-miR399g	2.54303	0.184628	0.50218	4.03446	0.654743	4.06585	2.65307	0.708306	0.781547	1.07661	2.91835	1.38098
	cro-miR399i	4.49268	0.676968	0.613776	2.31243	0.581994	1.98775	2.89426	0.252966	0.355249	1.92781	1.62739	1.16749
	cro-miR399j	1.52582	0.123085	0.334787	1.08241	0.0727492	1.08423	2.1707	0.404746	0.497348	0.661229	0.746464	1.02426
	sly-miR399b	108.672	2.4617	12.9451	213.334	9.60289	46.9832	85.1395	18.8207	20.8176	41.3596	89.9734	41.5926
408	ath-miR408-3p	1.01721	1.23085	0.111596	0.196803	0.94574	0.271057	0.562773	0.252966	0.0710498	0.786552	0.4712	0.295596
	cro-miR408b-5p	0.0847675	0.369255	0.223191	0.0492007	0.218248	0	0.160792	0.0505933	0.0710498	0.225738	0.0891494	0.0941451
	gma-miR408d	41.4513	52.5573	18.3017	9.74173	52.5249	24.7565	47.5945	13.4072	7.95757	37.4368	29.0077	22.9864
414	ath-miR414	0.423838	0	0.278989	0.295204	0.363746	0.542113	0.241188	0.202373	0.355249	0.234276	0.400354	0.26627
827	ath-miR827	1.52582	0.369255	0.334787	0.73801	0.654743	0.903522	0.964754	0.15178	0.0710498	0.743286	0.765425	0.395861
	sly-miR827	2.45826	0.369255	1.22755	4.57566	0.727492	2.34916	2.25109	0.202373	0.1421	1.35169	2.55077	0.865188
858	cro-miR858	7.54431	5.10803	5.52398	2.85364	3.71021	4.69832	4.58258	1.41661	2.98409	6.05877	3.75405	2.99443
1511	cro-miR1511a	0.593373	0.738511	0.390585	0.295204	1.23674	0.361409	0.723565	1.26483	0.355249	0.574156	0.631116	0.781215
	cro-miR1511b	0.33907	0.615425	0.278989	0.147602	0.509244	0.271057	0.482377	0.505933	0.0710498	0.411162	0.309301	0.35312
2111	cro-miR2111a-5p	0.169535	0.0615425	0	0	0	0.0903522	0.241188	0.101187	0.0710498	0.0770259	0.0301174	0.137808
4995	gma-miR4995	0.423838	0.49234	0.50218	0.295204	0.654743	0.542113	0.884357	0.708306	0.994697	0.472786	0.497353	0.862453
5368	gma-miR5368	2.62779	1.35394	2.06452	1.27922	4.2922	1.08423	6.43169	4.30043	4.47614	2.01542	2.21855	5.06942
5377	gma-miR5377b	1.01721	1.41548	0.836967	0.688809	0.94574	1.17458	0.964754	0.708306	0.994697	1.08989	0.936376	0.889252
5538	cro-miR5538	0.762908	0.861596	0.948563	1.57442	1.60048	1.44564	0.643169	2.63085	1.34995	0.857689	1.54018	1.54132
5658	ath-miR5658	0.254303	0.184628	0.0557978	0.344405	0.436495	0.632466	0.160792	0.252966	0.497348	0.164909	0.471122	0.303702
6300	cro-miR6300	6.10326	3.93872	1.61814	3.19804	3.12822	4.78867	97.1185	0.607119	0.710498	3.88671	3.70498	32.812
6478	cro-miR6478	189.71	130.901	22.4865	100.615	125.492	72.8239	132.01	9.61272	13.2153	114.366	99.6439	51.6128
8016	cro-miR8016	15.0886	9.66218	13.3357	16.3838	9.67564	13.2818	18.0891	21.5527	21.457	12.6955	13.1137	20.3663
8175	ath-miR8175	23.3958	22.4015	6.97472	153.063	104.177	13.6432	11.0947	685.539	279.226	17.5907	90.2944	325.286
10415	gma-miR10415	0.0847675	0.0615425	0.0557978	0.196803	0.0727492	0.271057	0	0.0505933	0.1421	0.0673693	0.180203	0.0642309
cro-novel	cro-novel-1	1.52582	1.66165	1.95292	3.09964	2.47347	2.34916	2.65307	2.12492	2.55779	1.71346	2.64076	2.44526
	cro-novel-10	1.27151	0.738511	0.892765	1.57442	0.581994	1.26493	1.92951	1.61898	0.710498	0.967596	1.14045	1.41966
	cro-novel-100	0.67814	0.307713	0.50218	0.393605	0.727492	0.180704	0.723565	0.404746	0.1421	0.496011	0.433934	0.42347
	cro-novel-101	92.1423	99.5143	101.887	83.5427	79.8786	94.7795	89.7221	93.7999	82.2756	97.8478	86.067	88.5992
	cro-novel-102	4.49268	2.52324	5.0218	3.29645	4.7287	4.42726	2.41188	2.63085	3.12619	4.01257	4.1508	2.72297
	cro-novel-103	19.2422	26.5864	22.2075	15.449	17.8963	14.2757	6.43169	13.6096	10.7996	22.6787	15.8737	10.2803
	cro-novel-104	35.6871	31.4482	41.4578	49.2499	42.2673	61.9816	53.785	68.8574	52.1505	36.1977	51.1663	58.2643
	cro-novel-105	16.5297	15.6933	14.9538	10.3321	14.1861	15.7213	14.9537	12.2942	14.9915	15.7256	13.4132	14.0798
	cro-novel-106	0.423838	0.430798	0.0557978	0.344405	0.436495	0.632466	0.884357	0	0.0710498	0.303478	0.471122	0.318469
	cro-novel-107	6.35756	3.56947	5.24499	1.62362	2.76447	3.79479	9.72793	6.0206	9.59172	5.05734	2.72763	8.44675
	cro-novel-109	0.508605	0.307713	0.836967	0.393605	0.727492	0.722818	0.321585	0.758899	0.1421	0.551095	0.614638	0.407528
	cro-novel-11	0.33907	0.123085	0.223191	0.196803	0	0.0903522	0.241188	0.101187	0.213149	0.228449	0.0957183	0.185175
	cro-novel-111	6.44233	3.07713	5.24499	4.96927	3.92846	6.95712	7.63763	5.91941	4.90243	4.92148	5.28495	6.15316
	cro-novel-112	7.37477	7.50819	8.36967	5.41207	6.76567	4.06585	3.93941	5.00873	5.18663	7.75088	5.41453	4.71159
	cro-novel-114	0.67814	0.369255	0.613776	0.393605	0.290997	0.632466	1.04515	1.16365	0.639448	0.553724	0.439023	0.949414
	cro-novel-115	1.18675	0.553883	0.781169	0.492007	0.581994	0.542113	1.20594	0.505933	0.852597	0.840599	0.538705	0.854824
	cro-novel-116	0.33907	0.123085	0.613776	0.0492007	0	0.451761	0.562773	0.657713	0	0.358644	0.166987	0.406828
	cro-novel-121	9.57873	13.6624	17.1299	28.8808	17.3871	18.4319	14.5517	14.3179	16.1283	13.457	21.5666	14.9993
	cro-novel-122	0.254303	0.0615425	0.557978	1.42682	0.654743	1.44564	0.723565	0.101187	0.213149	0.291274	1.17573	0.345967
	cro-novel-124	0.0847675	0.123085	0.167393	0.147602	0.581994	0.271057	0.562773	0.455339	0.213149	0.125082	0.333551	0.410421
	cro-novel-125	0.762908	0.861596	1.17175	0.590408	0.509244	0.542113	0.562773	0.758899	0.994697	0.932086	0.547255	0.772123
	cro-novel-127	0	0	0.111596	0.0492007	0.145498	0.542113	0.160792	0.15178	0.0710498	0.0371985	0.245604	0.127874
	cro-novel-128	4.32314	2.58479	2.73409	4.47726	3.56471	5.05973	8.12001	3.13678	3.48144	3.21401	4.36723	4.91274
	cro-novel-13	1.52582	1.60011	2.34351	2.90284	2.03698	2.0781	1.92951	1.66958	1.91834	1.82314	2.33931	1.83914
	cro-novel-130	0.169535	0.0615425	0.223191	0.393605	0.218248	0.632466	0.160792	0.101187	0.213149	0.151423	0.414773	0.158376
	cro-novel-131	0.508605	0.553883	1.00436	1.08241	0.509244	0.903522	0.964754	0.354153	1.49205	0.688949	0.831727	0.936984
	cro-novel-132	1.78012	2.33862	2.73409	2.95204	1.74598	4.60796	5.62773	2.985	2.69989	2.28428	3.102	3.77087
	cro-novel-133	0.33907	0.123085	0.223191	0.147602	0.290997	0.722818	0.482377	0.455339	0.1421	0.228449	0.387139	0.359939
	cro-novel-134	0.33907	0.615425	0.334787	0.393605	0.218248	0.722818	0.482377	0.556526	0.568398	0.429761	0.44489	0.535767
	cro-novel-136	0.423838	0.49234	0.836967	0.787211	0.800241	1.17458	0.241188	0.556526	0.213149	0.584382	0.920677	0.336955
	cro-novel-137	0	0	0.223191	0.196803	0	0	0.321585	0.15178	0.213149	0.0743971	0.0656009	0.228838
	cro-novel-138	1.01721	0.984681	0.836967	1.03321	0.727492	0.632466	0.803961	1.16365	0.568398	0.946286	0.797724	0.845335
	cro-novel-141	2.71256	0.676968	1.78553	2.50923	2.40072	2.62021	2.41188	1.77076	1.91834	1.72502	2.51006	2.03366
	cro-novel-142	0.169535	0.553883	0.0557978	0.492007	0.363746	0	0.482377	0	0.1421	0.259739	0.285251	0.208159
	cro-novel-145	5.34035	2.40016	4.01744	5.65808	7.49317	3.9755	4.26099	3.18738	4.47614	3.91932	5.70891	3.97484
	cro-novel-146	24.7521	22.5246	32.2511	18.8439	24.1527	23.1302	11.8986	28.737	16.5546	26.5093	22.0423	19.0634
	cro-novel-147	6.2728	2.95404	4.07324	3.39485	3.49196	3.16233	3.93941	3.23797	5.54188	4.43336	3.34971	4.23975
	cro-novel-149	0.33907	0.123085	0.111596	0.147602	0.0727492	0.451761	0.160792	0.101187	0.639448	0.19125	0.224037	0.300476
	cro-novel-15	0.0847675	0.184628	0.0557978	0.246003	0	0	0.0803961	0	0.1421	0.108398	0.0820011	0.0741652
	cro-novel-150	67.0511	54.5267	97.3672	56.0396	43.7223	62.1623	59.0912	63.8487	94.3541	72.9817	53.9747	72.4313
	cro-novel-153	1.27151	0.800053	1.56234	0.639609	2.47347	1.80704	1.68832	0.961272	1.63414	1.2113	1.64004	1.42791
	cro-novel-154	4.15361	6.46197	6.52834	4.47726	4.21945	6.95712	6.43169	6.42535	6.67868	5.71464	5.21795	6.5119
	cro-novel-156	0.254303	0.553883	0.334787	0.196803	0.145498	0.180704	0.401981	0.758899	0.284199	0.380991	0.174335	0.481693
	cro-novel-157	2.20396	1.47702	2.6225	0.688809	1.52773	1.71669	3.85901	2.37788	2.41569	2.10116	1.31108	2.8842
	cro-novel-158	0.423838	0.369255	0.278989	0.492007	0.654743	0.903522	0.241188	0.404746	0.639448	0.357361	0.683424	0.428461
	cro-novel-159	0.169535	0.123085	0.111596	0.541207	0.363746	0.361409	0.0803961	0.404746	0.213149	0.134739	0.422121	0.232764
	cro-novel-16	0	0.0615425	0.0557978	0	0	0.0903522	0.160792	0.101187	0	0.0391134	0.0301174	0.0873263
	cro-novel-160	7.79861	6.70814	6.91893	4.32966	6.11093	8.40276	11.577	4.65458	4.61824	7.14189	6.28112	6.94995
	cro-novel-161	0.593373	0.49234	0.334787	0.541207	0.0727492	0.361409	0.482377	0	0.923647	0.4735	0.325122	0.468675
	cro-novel-162	0.254303	0	0.223191	0.0492007	0.145498	0.0903522	0.321585	0	0	0.159165	0.0950171	0.107195
	cro-novel-164	2.28872	2.8925	2.34351	4.18206	3.85571	3.25268	1.84911	3.44034	2.13149	2.50824	3.76348	2.47365
	cro-novel-165	0.0847675	0.369255	0.111596	0.344405	0.436495	0.361409	0.0803961	0	0.497348	0.188539	0.38077	0.192582
	cro-novel-166	2.03442	1.04622	2.00872	2.11563	2.25522	1.26493	1.20594	0.860086	1.34995	1.69645	1.8786	1.13866
	cro-novel-167	0.593373	0.307713	0.613776	0.836411	0.509244	0.542113	0.160792	0.30356	0.355249	0.504954	0.629256	0.2732
	cro-novel-168	3.98407	2.64633	3.51526	5.26447	5.67444	3.9755	2.97466	6.62772	7.10498	3.38189	4.97147	5.56912
	cro-novel-169	3.645	3.81564	4.46382	6.88809	7.05667	5.05973	3.21585	4.60399	3.19724	3.97482	6.33483	3.67236
	cro-novel-170	1.01721	0.553883	1.39494	1.82043	1.52773	0.993875	1.12555	0.252966	1.34995	0.988679	1.44734	0.909486
	cro-novel-171	5.84896	6.52351	7.42111	9.24973	8.5844	9.03522	8.20041	10.5234	11.5101	6.59786	8.95645	10.078
	cro-novel-172	1.69535	0.369255	0.390585	2.80444	0.145498	0.903522	1.60792	1.56839	1.2789	0.818397	1.28449	1.48507
	cro-novel-19	1.86489	1.29239	1.22755	1.52522	1.30949	1.98775	1.36673	2.17551	1.2789	1.46161	1.60749	1.60705
	cro-novel-2	0.932443	0.430798	0.781169	0.196803	0.218248	0.632466	0.803961	0.607119	0.284199	0.714803	0.349172	0.565093
	cro-novel-20	0.169535	0.24617	0.111596	0.196803	0.145498	0.180704	0.160792	0	0.1421	0.175767	0.174335	0.100964
	cro-novel-21	0.33907	0.430798	0.167393	0.0492007	0.436495	0.271057	0.401981	0	0	0.31242	0.252251	0.133994
	cro-novel-22	0.33907	0.430798	0.278989	0.295204	0.145498	0.180704	1.12555	0.354153	0.1421	0.349619	0.207136	0.540599
	cro-novel-23	39.756	25.1094	39.0585	12.4478	33.6101	22.1363	27.8171	20.5409	22.807	34.6413	22.7314	23.7216
	cro-novel-24	0.423838	0.553883	0.390585	1.08241	0.290997	0.542113	0.321585	0.505933	0.213149	0.456102	0.638508	0.346889
	cro-novel-25	1.18675	0.49234	0.613776	0.787211	0.290997	0.903522	0.723565	1.06246	0.497348	0.764287	0.660577	0.761124
	cro-novel-26	7.62908	4.24644	5.1334	6.29769	3.92846	6.41501	6.91407	3.7439	4.54719	5.66964	5.54705	5.06838
	cro-novel-28	0.762908	0.676968	1.00436	1.52522	0.94574	0.542113	1.60792	1.56839	1.34995	0.814745	1.00436	1.50875
	cro-novel-3	0.0847675	0.24617	0.669574	0.442806	0.363746	0.271057	0.401981	0.252966	0.426299	0.333504	0.359203	0.360415
	cro-novel-30	151.31	60.6194	115.892	184.011	63.4373	189.559	144.311	148.441	188.85	109.274	145.669	160.534
	cro-novel-31	1.78012	0.861596	1.28335	1.62362	1.74598	1.8974	1.84911	1.41661	1.56309	1.30835	1.75567	1.60961
	cro-novel-32	0.0847675	0	0.111596	0.0984014	0	0	0.0803961	0.0505933	0.0710498	0.0654544	0.0328005	0.0673464
	cro-novel-33	0.169535	0.123085	0.50218	0.0492007	0.145498	0.0903522	0.0803961	0.455339	0	0.264933	0.0950171	0.178579
	cro-novel-34	2179.8	2129.99	2041.75	1507.85	3232.17	2526.79	1254.58	696.416	1026.95	2117.18	2422.27	992.65
	cro-novel-35	3.3907	2.52324	5.24499	2.11563	4.1467	3.16233	3.61783	6.7795	5.96818	3.71965	3.14155	5.45517
	cro-novel-36	0.33907	0	0.0557978	0.0984014	0.218248	0.0903522	0.401981	0	0.1421	0.131623	0.135667	0.18136
	cro-novel-37	0.932443	0.369255	0.669574	0.73801	0.509244	0.271057	0.482377	0.202373	0.284199	0.65709	0.506104	0.322983
	cro-novel-38	154.446	80.4977	148.422	63.1737	92.6097	82.853	136.593	114.341	186.648	127.789	79.5455	145.861
	cro-novel-39	0.0847675	0.184628	0	0.0984014	0	0	0.160792	0	0	0.0897984	0.0328005	0.0535974
	cro-novel-4	0.0847675	0.307713	0.167393	0	0.145498	0.0903522	0.401981	0.252966	0.284199	0.186625	0.0786169	0.313049
	cro-novel-40	4.66221	3.50793	2.78989	5.65808	4.4377	5.15008	4.26099	3.59212	4.47614	3.65334	5.08195	4.10975
	cro-novel-41	11.1045	5.16957	7.97908	10.8241	9.67564	19.5161	18.3303	25.246	19.6808	8.0844	13.3386	21.0857
	cro-novel-42	3.1364	3.13867	3.23627	3.83765	2.90997	3.43338	3.77862	1.36602	2.84199	3.17045	3.39367	2.66221
	cro-novel-43	18.4793	24.3708	20.7568	9.59413	15.7138	20.8714	23.5561	14.3685	17.7624	21.2023	15.3931	18.5623
	cro-novel-44	0	0.184628	0	0.0492007	0	0	1.28634	0.0505933	0	0.0615425	0.0164002	0.445644
	cro-novel-45	0.169535	0.0615425	0.111596	0.0492007	0	0.180704	0.241188	0.0505933	0.213149	0.114224	0.076635	0.16831
	cro-novel-46	602.782	315.406	446.494	536.829	417.217	460.796	964.191	641.472	745.241	454.894	471.614	783.635
	cro-novel-47	0.593373	0.184628	0.50218	2.55844	0.436495	1.17458	0.321585	0.657713	0.497348	0.426727	1.38984	0.492215
	cro-novel-48	1.61058	2.0309	1.61814	3.83765	1.74598	3.70444	3.69822	1.21424	2.48674	1.75321	3.09602	2.4664
	cro-novel-49	2.96686	2.33862	2.6225	4.77247	4.00121	3.61409	1.44713	3.28856	2.98409	2.64266	4.12925	2.57326
	cro-novel-5	0.169535	0.24617	0.167393	0.0492007	0.290997	0.0903522	0.401981	0.30356	0.355249	0.194366	0.143517	0.353596
	cro-novel-50	0	0.184628	0.223191	0.246003	0.218248	0.271057	0.321585	0.252966	0.284199	0.13594	0.245103	0.28625
	cro-novel-51	114.69	92.56	142.508	126.151	70.5667	104.628	86.1043	74.4227	126.469	116.586	100.448	95.6652
	cro-novel-53	31.6183	90.1598	102.222	212.793	55.2894	100.291	5.62773	132.706	161.567	74.6666	122.791	99.967
	cro-novel-55	1.35628	1.84628	2.12032	1.52522	0.87299	1.44564	3.61783	1.21424	2.34464	1.77429	1.28128	2.39224
	cro-novel-56	5.59466	4.18489	5.74717	6.29769	5.45619	7.04747	9.00437	6.98187	4.90243	5.17557	6.26712	6.96289
	cro-novel-57	0.33907	1.23085	1.11596	1.37762	1.09124	1.44564	1.52753	0.910679	0.781547	0.895292	1.30483	1.07325
	cro-novel-58	1.69535	1.10777	0.836967	1.62362	1.16399	1.35528	1.84911	0.15178	1.421	1.21336	1.38096	1.14063
	cro-novel-6	0.254303	0.738511	0.278989	0.541207	1.01849	0.271057	0.241188	0.404746	0.213149	0.423934	0.610251	0.286361
	cro-novel-60	31.8726	24.0631	21.9843	48.1183	37.2476	80.8652	60.1363	22.8176	35.4538	25.9734	55.4104	39.4692
	cro-novel-62	5.08605	8.12362	8.36967	5.75648	4.4377	9.12558	11.6574	8.80323	15.3468	7.19311	6.43992	11.9358
	cro-novel-63	42.3838	64.435	64.6696	77.1959	73.8404	81.6784	53.5438	116.769	104.727	57.1628	77.5716	91.6802
	cro-novel-64	1.78012	0.861596	1.28335	2.55844	0.87299	2.43951	2.33149	2.68144	2.77094	1.30835	1.95698	2.59462
	cro-novel-65	34.8394	9.84681	23.3235	30.8488	20.1515	28.732	38.349	30.7101	26.2174	22.6699	26.5775	31.7588
	cro-novel-67	0.762908	0.369255	0.446382	0.147602	0.145498	0.542113	0.803961	0.101187	0.355249	0.526182	0.278405	0.420132
	cro-novel-69	0.169535	0.0615425	0	0	0	0.0903522	0.401981	1.87195	0.0710498	0.0770259	0.0301174	0.78166
	cro-novel-7	1.10198	0.49234	0.446382	2.46003	1.45498	1.98775	1.68832	1.06246	0.852597	0.680233	1.96759	1.20112
	cro-novel-70	7.62908	2.27707	5.69138	11.4146	9.1664	9.03522	6.35129	9.10679	9.66277	5.19918	9.87206	8.37362
	cro-novel-71	3.30593	5.84654	4.46382	3.14884	2.47347	3.9755	3.93941	1.5178	2.98409	4.53877	3.19927	2.81377
	cro-novel-72	116.047	166.411	148.422	49.0039	46.8505	125.319	182.097	199.54	62.5948	143.627	73.7243	148.077
	cro-novel-73	0.254303	0.307713	0.167393	0.344405	0.145498	0.361409	0.643169	0.0505933	0.284199	0.243136	0.283771	0.325987
	cro-novel-74	0.508605	0.923138	0.669574	0.147602	0.290997	0.542113	0.321585	0.101187	0.284199	0.700439	0.326904	0.235657
	cro-novel-75	8.22245	7.69282	8.14648	11.021	9.3119	9.12558	8.12001	5.00873	5.82608	8.02058	9.81947	6.31827
	cro-novel-76	0.508605	0.49234	0.0557978	0.393605	1.30949	0.722818	0.160792	0.15178	0.639448	0.352248	0.808636	0.31734
	cro-novel-77	0.847675	1.41548	1.28335	0.885612	1.67323	1.71669	1.20594	1.92254	1.34995	1.18217	1.42518	1.49281
	cro-novel-78	0.254303	0.307713	0.111596	0.147602	0.145498	0.180704	0.0803961	0	0	0.224537	0.157935	0.0267987
	cro-novel-79	2.28872	2.76941	3.57106	1.67282	1.45498	1.71669	2.25109	3.64272	5.61293	2.8764	1.61483	3.83558
	cro-novel-8	1.35628	0.800053	0.781169	0.934813	0.509244	1.17458	1.04515	0.404746	0.994697	0.979167	0.872879	0.814864
	cro-novel-80	2.71256	2.15399	1.78553	2.21403	2.25522	2.62021	3.93941	1.97314	1.421	2.21736	2.36316	2.44451
	cro-novel-81	0.169535	0.0615425	0.725371	0.295204	0.145498	0.81317	0.241188	0.0505933	0.355249	0.318816	0.417958	0.215677
	cro-novel-82	4.66221	7.44665	8.48126	6.19929	8.8754	9.12558	3.53743	5.66645	3.41039	6.86338	8.06675	4.20476
	cro-novel-83	4.66221	2.15399	4.51962	4.87087	4.2922	4.1562	4.50218	4.04746	5.75503	3.77861	4.43976	4.76823
	cro-novel-84	0.169535	0.24617	0.167393	0.639609	0.218248	0.542113	0.482377	0.252966	0.213149	0.194366	0.466657	0.316164
	cro-novel-85	5.00128	3.38484	5.57978	3.59165	2.98272	4.33691	5.94931	4.95814	3.76564	4.6553	3.63709	4.89103
	cro-novel-86	0.169535	0.184628	0.111596	0.147602	0.0727492	0.542113	0.0803961	0.0505933	0.1421	0.155253	0.254155	0.0910296
	cro-novel-87	1.78012	1.41548	1.50654	1.08241	1.81873	0.993875	2.81386	1.72017	0.781547	1.56738	1.29834	1.77186
	cro-novel-88	1.01721	0.553883	0.725371	1.13162	0.87299	2.52986	1.60792	0.455339	0.781547	0.765488	1.51149	0.94827
	cro-novel-89	1.52582	0.861596	1.00436	1.23002	1.01849	0.993875	1.04515	0.657713	1.1368	1.13059	1.08079	0.946553
	cro-novel-9	0.67814	0.123085	0.111596	0.246003	0.290997	0	0.321585	0.30356	0.497348	0.304274	0.179	0.374164
	cro-novel-90	7.12047	5.60037	10.5458	4.67406	9.3119	7.04747	4.34139	5.31229	4.19194	7.75554	7.01115	4.61521
	cro-novel-91	5.84896	4.00027	5.46818	7.82291	6.76567	8.58346	9.16516	7.74077	6.53658	5.1058	7.72401	7.81417
	cro-novel-94	3.30593	2.15399	2.73409	2.11563	2.10973	2.25881	3.21585	1.92254	0.852597	2.73134	2.16139	1.997
	cro-novel-95	2.03442	0.984681	1.84133	1.72202	1.16399	3.34303	2.1707	4.45221	4.19194	1.62014	2.07635	3.60495
	cro-novel-96	6.69663	6.6466	8.64866	4.18206	4.1467	5.78254	5.54733	5.21111	4.61824	7.33063	4.70377	5.12556
	cro-novel-98	3.81454	4.49261	2.28771	1.67282	12.1491	1.98775	1.84911	1.87195	1.2789	3.53162	5.2699	1.66665
	cro-novel-99	1.35628	0.49234	0.669574	1.42682	1.74598	2.34916	1.60792	1.06246	1.2789	0.839398	1.84065	1.31643

## Sheet: Table S3
Table S3.
z-scores of miRNAs in the three different groups of plants showing data for the detected miRNA, ordered according to the clusters shown on Figure 4.
miRNA	Vir	WB	NO	Clusters
ath-miR157a-5p	503.035	569.296	523.702	1
sly-miR399b	41.3596	89.9734	41.5926	1
cro-miR166h-5p	17.5422	21.1891	16.5634	1
cro-novel-121	13.457	21.5666	14.9993	1
cro-miR396c	14.8259	17.8128	14.2084	1
cro-miR166d-5p	9.51625	23.1809	11.969	1
cro-novel-40	3.65334	5.08195	4.10975	1
cro-novel-145	3.91932	5.70891	3.97484	1
cro-novel-169	3.97482	6.33483	3.67236	1
gma-miR166i-5p	7.5493	25.7151	3.57117	1
cro-novel-34	2117.18	2422.27	992.65	2
cro-miR397a	133.998	137.851	82.3538	2
cro-miR172g-3p	19.1459	28.9686	6.78311	2
cro-novel-75	8.02058	9.81947	6.31827	2
cro-novel-82	6.86338	8.06675	4.20476	2
ath-miR166e-5p	4.34922	5.07785	3.27383	2
cro-miR166b-5p	3.40295	5.23814	1.84096	2
cro-novel-98	3.53162	5.2699	1.66665	2
cro-miR166b	589.667	455.468	392.481	3
cro-miR166m	581.501	450.124	386.564	3
cro-miR166a	579.32	449.004	383.856	3
cro-miR166j-3p	576.701	447.357	381.757	3
cro-miR398a-3p-2	1326.38	1020.87	379.618	3
cro-miR398f	1301.83	995.048	368.606	3
cro-miR398a-3p-1	1287.87	985.068	364.347	3
cro-miR398	1283.46	976.922	362.299	3
cro-miR166T	214.135	181.542	171.655	3
cro-novel-51	116.586	100.448	95.6652	3
cro-miR399b	120.232	88.8921	53.8632	3
cro-miR6478	114.366	99.6439	51.6128	3
gma-miR166h-3p	40.7894	32.373	30.0786	3
gma-miR408d	37.4368	29.0077	22.9864	3
cro-novel-146	26.5093	22.0423	19.0634	3
cro-novel-103	22.6787	15.8737	10.2803	3
cro-novel-26	5.66964	5.54705	5.06838	3
cro-novel-112	7.75088	5.41453	4.71159	3
cro-novel-90	7.75554	7.01115	4.61521	3
cro-miR858	6.05877	3.75405	2.99443	3
cro-miR171c-5p	8.87026	2.19107	0.412837	3
cro-miR395a	12.6289	1.3762	0.312937	3
cro-miR395d	12.5011	1.27998	0.218792	3
cro-miR166h-3p	110187	89050.1	110681	4
cro-miR159a	5998.23	3018.23	7460.14	4
cro-miR396e	4137.7	1321.14	4099.39	4
cro-miR396a-5p	4131.53	1317.8	4091.02	4
cro-miR396b-5p	1287.54	599.644	1283.37	4
cro-miR159b	195.45	127.951	240.915	4
cro-novel-72	143.627	73.7243	148.077	4
cro-novel-38	127.789	79.5455	145.861	4
cro-miR396a-3p-1	102.677	88.7384	108.391	4
cro-novel-150	72.9817	53.9747	72.4313	4
cro-miR159f	27.205	16.4577	38.7122	4
cro-miR396g	16.5482	8.83874	22.5704	4
cro-miR166e-3p-2	21.1288	14.7753	21.1717	4
cro-miR396b	13.9295	7.87861	19.6711	4
cro-miR393a-5p	9.52559	7.16167	10.9659	4
cro-miR393a	8.75858	5.75658	9.30129	4
cro-miR396a	7.42932	3.46725	9.26261	4
cro-novel-107	5.05734	2.72763	8.44675	4
cro-miR396d	5.12046	2.78403	7.38043	4
ath-miR159b-3p	6.49863	4.41775	6.24541	4
gma-miR159d	4.42234	3.01732	5.16094	4
cro-miR394a	5.15886	2.42327	4.77136	4
cro-miR166	59129.1	35752.1	49446	5
cro-miR396h	3291.66	752.5	1779.81	5
cro-miR166e-3p-1	1133.94	1064.75	1105.35	5
cro-novel-101	97.8478	86.067	88.5992	5
cro-miR319e	97.6881	68.9557	83.3405	5
cro-miR166i	62.0476	38.9471	51.4361	5
cro-miR396a-3p-3	57.6981	37.0853	47.6564	5
ath-miR156a-5p	77.1126	33.2043	46.7809	5
cro-miR319a	51.13	18.1987	38.7263	5
cro-novel-23	34.6413	22.7314	23.7216	5
ath-miR159c	22.3653	14.7307	20.2906	5
cro-novel-43	21.2023	15.3931	18.5623	5
cro-miR319a-3p	23.6083	11.3295	14.2252	5
cro-novel-105	15.7256	13.4132	14.0798	5
cro-miR319g	23.3965	11.1363	14.0102	5
sly-miR166c-3p	14.3584	7.90858	11.2451	5
gma-miR166p	8.47716	6.82199	7.40732	5
cro-novel-160	7.14189	6.28112	6.94995	5
cro-novel-96	7.33063	4.70377	5.12556	5
cro-novel-46	454.894	471.614	783.635	6
cro-miR162a-3p	111.483	121.365	184.334	6
cro-miR393b-5p	64.121	56.314	78.2833	6
cro-miR166c	47.236	43.2181	65.5225	6
ath-miR167d	26.2169	26.4496	49.7235	6
cro-miR165a-3p-1	16.4675	21.8371	38.0222	6
cro-miR6300	3.88671	3.70498	32.812	6
cro-miR390a-5p	6.31009	9.17372	20.3766	6
cro-miR8016	12.6955	13.1137	20.3663	6
cro-miR170-5p	10.3664	11.9563	19.4288	6
cro-novel-62	7.19311	6.43992	11.9358	6
cro-miR156b-3p-2	5.92792	5.29209	9.55022	6
cro-miR156f-3p-1	6.07734	5.23255	9.44926	6
cro-miR319	5.20061	4.40925	7.44303	6
cro-miR393a-3p	5.2893	5.44056	6.76052	6
cro-novel-154	5.71464	5.21795	6.5119	6
cro-novel-111	4.92148	5.28495	6.15316	6
cro-novel-35	3.71965	3.14155	5.45517	6
gma-miR5368	2.01542	2.21855	5.06942	6
cro-novel-53	74.6666	122.791	99.967	7
cro-novel-60	25.9734	55.4104	39.4692	7
cro-miR156d-3p	7.91705	24.665	13.8492	7
cro-miR157d-3p	7.83882	24.6426	13.8048	7
cro-novel-70	5.19918	9.87206	8.37362	7
ath-miR168a-5p	318.133	551.254	1090.54	8
ath-miR8175	17.5907	90.2944	325.286	8
cro-miR165a-3p-2	87.5237	117.959	163.255	8
cro-novel-30	109.274	145.669	160.534	8
cro-novel-63	57.1628	77.5716	91.6802	8
cro-novel-104	36.1977	51.1663	58.2643	8
ath-miR167a-5p	15.7263	29.25	40.0512	8
cro-miR168a-3p-1	9.61823	16.3652	32.7588	8
cro-novel-65	22.6699	26.5775	31.7588	8
cro-miR390a-3p-1	3.9486	15.3346	27.826	8
gma-miR391-5p	11.3837	25.3357	27.6587	8
cro-miR390a-3p-2	3.83246	14.788	27.0569	8
gma-miR168b	11.9194	23.7755	26.2147	8
ath-miR166a-3p	8.40564	13.4366	24.916	8
gma-miR159a-5p	10.5429	20.8718	22.1048	8
cro-novel-41	8.0844	13.3386	21.0857	8
cro-novel-171	6.59786	8.95645	10.078	8
cro-novel-91	5.1058	7.72401	7.81417	8
gma-miR167l	3.02123	5.03289	7.11774	8
cro-novel-56	5.17557	6.26712	6.96289	8
cro-novel-168	3.38189	4.97147	5.56912	8

## Sheet: Table S4
Table S4.
Summary of the main changes in the miRNA expression of the phytoplasma infected plants, ordered according to the miRNA family, highlighting relative expression of the Vir and WB plants compared to the NO plants. Green shows the most abundant miRNA species in the family. Blue shows down, while red shows upregulation. Their intensity is proportional to the intensity of change. MiRNA forms indicated…
miRNA	miRNA	sequence	average RPM of the miRNA			relative expression of the miRNA		Clusters
			Vir	WB	NO	Vir/NO	WB/NO
156	ath-miR156a-5p	TGACAGAAGAGAGTGAGCAC	77.1126	33.2043	46.7809	1.64838	0.709784	5
	cro-miR156b-3p-2	GCTCACTCTCTATCTGTCACC	5.92792	5.29209	9.55022	0.62071	0.554132	6
	cro-miR156f-3p-1	GCTCACTCTCTATCTGTCACC	6.07734	5.23255	9.44926	0.643156	0.553753	6
	cro-miR156d-3p	GCTCTCTATGCTTCTGTCATC	7.91705	24.665	13.8492	0.571662	1.78097	7
157	ath-miR157a-5p	TTGACAGAAGATAGAGAGCAC	503.035	569.296	523.702	0.960538	1.08706	1
	cro-miR157d-3p	GCTCTCTATGCTTCTGTCATC	7.83882	24.6426	13.8048	0.567832	1.78507	7
159	cro-miR159a	TTTGGATTGAAGGGAGCTCTA	5998.23	3018.23	7460.14	0.804037	0.40458	4
	cro-miR159b	TTTGGATTGAAGGGAGCTCT	195.45	127.951	240.915	0.811282	0.531107	4
	cro-miR159f	TTGGATTGAAGGGAGCTCTA	27.205	16.4577	38.7122	0.702751	0.42513	4
	ath-miR159b-3p	TTTGGATTGAAGGGAGCTTTTT	6.49863	4.41775	6.24541	1.04054	0.707359	4
	gma-miR159d	AGCTGCTGAGATATGGATCCC	4.42234	3.01732	5.16094	0.856886	0.584645	4
	ath-miR159c	TTTGGATTGAAGGGAGCTCTTTT	22.3653	14.7307	20.2906	1.10225	0.725986	5
	gma-miR159a-5p	GAGCTCCTTGAAGTCCAAAAG	10.5429	20.8718	22.1048	0.476952	0.944219	8
162	cro-miR162a-3p	TCGATAAACCTCTGCATCCAG	111.483	121.365	184.334	0.604788	0.658396	6
165	cro-miR165a-3p-1	TCGGACCAGGCTTCATCCCC	16.4675	21.8371	38.0222	0.433104	0.574325	6
	cro-miR165a-3p-2	TCGGACCAGGCTTCATCCCCC	87.5237	117.959	163.255	0.536118	0.722549	8
166	cro-miR166h-5p	GGAATGTTGGCTGGCTCGACG	17.5422	21.1891	16.5634	1.05909	1.27927	1
	cro-miR166d-5p	GAATGTTGTCTGGCTCGAGGC	9.51625	23.1809	11.969	0.795077	1.93675	1
	gma-miR166i-5p	GGAATGTCGTCTGGCTCGAAA	7.5493	25.7151	3.57117	2.11396	7.20076	1
	ath-miR166e-5p	GAATGTTGTCTGGTGCGAGGCC	4.34922	5.07785	3.27383	1.32848	1.55104	2
	cro-miR166b-5p	GGAATGTTGTCTGGCT	3.40295	5.23814	1.84096	1.84847	2.84534	2
	cro-miR166b	TTCGGACCAGGCTTCATTCCC	589.667	455.468	392.481	1.50241	1.16049	3
	cro-miR166m	TTCGGACCAGGCTTCATTCCC	581.501	450.124	386.564	1.50428	1.16442	3
	cro-miR166a	TTCGGACCAGGCTTCATTCCC	579.32	449.004	383.856	1.50921	1.16972	3
	cro-miR166j-3p	TTCGGACCAGGCTTCATTCCC	576.701	447.357	381.757	1.51065	1.17184	3
	cro-miR166T	TCTCGGACCAGGCTTCATTC	214.135	181.542	171.655	1.24747	1.0576	3
	gma-miR166h-3p	TCTCGGACCAGGCTTCATTTTT	40.7894	32.373	30.0786	1.3561	1.07628	3
	cro-miR166h-3p	TCTCGGACCAGGCTTCATTCC	110187	89050.1	110681	0.995538	0.804566	4
	cro-miR166e-3p-2	TCGAACCAGGCTTCATTCCCC	21.1288	14.7753	21.1717	0.997973	0.697877	4
	cro-miR166	TCGGACCAGGCTTCATTCCCCC	59129.1	35752.1	49446	1.19583	0.723053	5
	cro-miR166e-3p-1	CTCGGACCAGGCTTCATTCCC	1133.94	1064.75	1105.35	1.02587	0.963269	5
	cro-miR166i	TCGGACCAGGCTTCATTCT	62.0476	38.9471	51.4361	1.20631	0.757194	5
	sly-miR166c-3p	TCGGACCAGGCTTCATTTTTC	14.3584	7.90858	11.2451	1.27687	0.703294	5
	gma-miR166p	TCTCGGACCAGGCTTCATTTTC	8.47716	6.82199	7.40732	1.14443	0.920979	5
	cro-miR166c	TTGGACCAGGCTTCATTCCCC	47.236	43.2181	65.5225	0.720913	0.659593	6
	ath-miR166a-3p	TCCGGACCAGGCTTCATTCC	8.40564	13.4366	24.916	0.337359	0.539275	8
167	ath-miR167d	TGAAGCTGCCAGCATGATCTGG	26.2169	26.4496	49.7235	0.527254	0.531933	6
	ath-miR167a-5p	TGAAGCTGCCAGCATGATCTA	15.7263	29.25	40.0512	0.392656	0.730316	8
	gma-miR167l	TGAAGCTGCCAGCATGATCT	3.02123	5.03289	7.11774	0.424465	0.707092	8
168	ath-miR168a-5p	TCGCTTGGTGCAGGTCGGGAA	318.133	551.254	1090.54	0.291721	0.505488	8
	cro-miR168a-3p-1	CCCGCCTTGCATCAACTGAAT	9.61823	16.3652	32.7588	0.293608	0.499568	8
	gma-miR168b	TCGCTTGGTGCAGGTCGGG	11.9194	23.7755	26.2147	0.454683	0.906954	8
170	cro-miR170-5p	TATTGGCCTGGTTCACTCAGA	10.3664	11.9563	19.4288	0.533559	0.61539	6
171	cro-miR171c-5p	AGATATTGGTGCGGTTCAATG	8.87026	2.19107	0.412837	21.4861	5.30735	3
172	cro-miR172g-3p	AGAATCTTGATGATGCTGCAT	19.1459	28.9686	6.78311	2.82258	4.27069	2
319	cro-miR319e	CTTGGACTGAAGGGAGCTCCC	97.6881	68.9557	83.3405	1.17216	0.827398	5
	cro-miR319a	TTGGACTGAAGGGAGCTCCC	51.13	18.1987	38.7263	1.32029	0.46993	5
	cro-miR319a-3p	TTGGACTGAAGGGAGCTCCC	23.6083	11.3295	14.2252	1.6596	0.796434	5
	cro-miR319g	TTGGACTGAAGGGAGCTCCC	23.3965	11.1363	14.0102	1.66997	0.79487	5
	cro-miR319	ATTGGACTGAAGGGAGCTCC	5.20061	4.40925	7.44303	0.698723	0.592399	6
390	cro-miR390a-5p	AAGCTCAGGAGGGATAGCGCC	6.31009	9.17372	20.3766	0.309673	0.450208	6
	cro-miR390a-3p-1	CGCTATCTATCCTGAGTTTC	3.9486	15.3346	27.826	0.141903	0.55109	8
	cro-miR390a-3p-2	CGCTATCTATCCTGAGTTTC	3.83246	14.788	27.0569	0.141644	0.54655	8
391	gma-miR391-5p	TACGCAGGAGAGATGGCGCCGT	11.3837	25.3357	27.6587	0.411576	0.916009	8
393	cro-miR393a-5p	TCCAAAGGGATCGCATTGATT	9.52559	7.16167	10.9659	0.868658	0.653087	4
	cro-miR393a	TCCAAAGGGATCGCATTGATT	8.75858	5.75658	9.30129	0.941652	0.618901	4
	cro-miR393b-5p	TCCAAAGGGATCGCATTGATTT	64.121	56.314	78.2833	0.81909	0.719362	6
	cro-miR393a-3p	GATCATGCTATCCCTTTGGAT	5.2893	5.44056	6.76052	0.78238	0.804755	6
394	cro-miR394a	TTGGCATTCTGTCCACCTCC	5.15886	2.42327	4.77136	1.08121	0.507878	4
395	cro-miR395a	CTGAAGTGTTTGGGGGAACTC	12.6289	1.3762	0.312937	40.3559	4.39769	3
	cro-miR395d	CTGAAGTGTTTGGGGGAACTC	12.5011	1.27998	0.218792	57.1367	5.85022	3
396	cro-miR396c	TTCAAGAAAGCTGTGGGAAA	14.8259	17.8128	14.2084	1.04346	1.25368	1
	cro-miR396e	TTCCACAGCTTTCTTGAACTG	4137.7	1321.14	4099.39	1.00935	0.322278	4
	cro-miR396a-5p	TTCCACAGCTTTCTTGAACTG	4131.53	1317.8	4091.02	1.0099	0.322121	4
	cro-miR396b-5p	TTCCACAGCTTTCTTGAACTT	1287.54	599.644	1283.37	1.00325	0.46724	4
	cro-miR396a-3p-1	GTTCAATAAAGCTGTGGGATG	102.677	88.7384	108.391	0.947286	0.818688	4
	cro-miR396g	TTCCACAGCTTTCTTGAACT	16.5482	8.83874	22.5704	0.733181	0.391607	4
	cro-miR396b	TTCCACAGCTTTCTTGAACT	13.9295	7.87861	19.6711	0.708123	0.400518	4
	cro-miR396a	TTCCACAGCTTTCTTGAAC	7.42932	3.46725	9.26261	0.802076	0.374328	4
	cro-miR396d	TTCCACAGCTTTCTTGAAC	5.12046	2.78403	7.38043	0.693789	0.377218	4
	cro-miR396h	CAGCTTTCTTGAACTG	3291.66	752.5	1779.81	1.84944	0.422798	5
	cro-miR396a-3p-3	TTCAATAAAGCTGTGGGATG	57.6981	37.0853	47.6564	1.21071	0.77818	5
397	cro-miR397a	TCATTGAGTGCAGCGTTGATG	133.998	137.851	82.3538	1.6271	1.67388	2
398	cro-miR398a-3p-2	TGTGTTCTCAGGTCGCCCCTG	1326.38	1020.87	379.618	3.49399	2.6892	3
	cro-miR398f	TGTGTTCTCAGGTCGCCCCTG	1301.83	995.048	368.606	3.53177	2.69949	3
	cro-miR398a-3p-1	TGTGTTCTCAGGTCGCCCCTG	1287.87	985.068	364.347	3.53475	2.70365	3
	cro-miR398	TGTGTTCTCAGGTCGCCCCTG	1283.46	976.922	362.299	3.54254	2.69645	3
399	sly-miR399b	GGGCTACTCTCGTTTGGCATG	41.3596	89.9734	41.5926	0.994398	2.16321	1
	cro-miR399b	TGCCAAAGGAGAGTTGCCCTG	120.232	88.8921	53.8632	2.23218	1.65033	3
408	gma-miR408d	TGCACTGCCTCTTCCCTGGCTG	37.4368	29.0077	22.9864	1.62865	1.26195	3
858	cro-miR858	CTCGTTGTCTGTTCGACCTTG	6.05877	3.75405	2.99443	2.02335	1.25368	3
5368	gma-miR5368	AGGGACAGTCTCAGGTAGACA	2.01542	2.21855	5.06942	0.397564	0.437634	6
6300	cro-miR6300	GTCGTTGTAGTATAGTGG	3.88671	3.70498	32.812	0.118454	0.112915	6
6478	cro-miR6478	CCGACCTTAGCTCAGT	114.366	99.6439	51.6128	2.21584	1.9306	3
8016	cro-miR8016	ATTTTTGAATAGAAGGCCCATGTG	12.6955	13.1137	20.3663	0.623358	0.643895	6
8175	ath-miR8175	CGATCCCCGGCAACGGCGCCA	17.5907	90.2944	325.286	0.0540775	0.277584	8
cro-novel	cro-novel-101	AGTCTGCAGGACTGCTGAGTCACC	97.8478	86.067	88.5992	1.10439	0.971419	5
	cro-novel-103	ATTTAAGTAGTGATTGTGGTTCCC	22.6787	15.8737	10.2803	2.20604	1.54409	3
	cro-novel-104	GTTTGGCCTCCAGTCTGTAGAGC	36.1977	51.1663	58.2643	0.621267	0.878175	8
	cro-novel-105	GATTTGAACTTTGGTCCTTGGTA	15.7256	13.4132	14.0798	1.11689	0.952655	5
	cro-novel-107	ATTGGATTGAAGGGAGCTCTA	5.05734	2.72763	8.44675	0.598732	0.32292	4
	cro-novel-111	AGATAGTCACGTTAGGGAGTAGCT	4.92148	5.28495	6.15316	0.79983	0.8589	6
	cro-novel-112	AAGGACAGAATCAAAAGGAACATG	7.75088	5.41453	4.71159	1.64507	1.14919	3
	cro-novel-121	AGGAGATCGCGTAATTGGATTACA	13.457	21.5666	14.9993	0.897178	1.43784	1
	cro-novel-145	GCTCGACGTCCAGGTAGAAGATGT	3.91932	5.70891	3.97484	0.986033	1.43626	1
	cro-novel-146	AAGTACCGTTAGACTCATGAGTTG	26.5093	22.0423	19.0634	1.39058	1.15626	3
	cro-novel-150	ATTGAATGTAGACGAATGAAGATT	72.9817	53.9747	72.4313	1.0076	0.745185	4
	cro-novel-154	TTCTGTATGAATAAGGTTCTA	5.71464	5.21795	6.5119	0.877568	0.801293	6
	cro-novel-160	TCCTCTTCGGATAACACCTGA	7.14189	6.28112	6.94995	1.02762	0.903764	5
	cro-novel-168	ATAAGAGATTGATTTGAAGAGAGT	3.38189	4.97147	5.56912	0.607257	0.892685	8
	cro-novel-169	TAATTAGCCGATGTAAGATTC	3.97482	6.33483	3.67236	1.08236	1.725	1
	cro-novel-171	ATGCATCTGTTATTCGTCTTTGGA	6.59786	8.95645	10.078	0.654682	0.888717	8
	cro-novel-23	ATGGCTGAGACCGAAGAGTGGAGG	34.6413	22.7314	23.7216	1.46032	0.958256	5
	cro-novel-26	ATCGCCTGTACTACTTTGTGTATC	5.66964	5.54705	5.06838	1.11863	1.09444	3
	cro-novel-30	ATCACATGGGCTTGTCGGGAATGG	109.274	145.669	160.534	0.68069	0.907402	8
	cro-novel-34	TGGCATCATCTCCTTGCGGAC	2117.18	2422.27	992.65	2.13285	2.44021	2
	cro-novel-35	ACGGATCTGTTCTATAAAAGAATT	3.71965	3.14155	5.45517	0.681857	0.575886	6
	cro-novel-38	TGAGCACGTGACTTGGGCATG	127.789	79.5455	145.861	0.876102	0.545353	4
	cro-novel-40	CCTCTGTAACATTTTCTGTAACA	3.65334	5.08195	4.10975	0.888945	1.23656	1
	cro-novel-41	CGGCGTCATCTCCTTGCGGAC	8.0844	13.3386	21.0857	0.383407	0.632591	8
	cro-novel-43	TATACTGTCATCTATGTCCTC	21.2023	15.3931	18.5623	1.14222	0.829266	5
	cro-novel-46	TTGGACCACATTAAATCATATTAT	454.894	471.614	783.635	0.580492	0.601829	6
	cro-novel-51	TTATACAGTGAAATCGTGGTCG	116.586	100.448	95.6652	1.21869	1.05	3
	cro-novel-53	TGGACATCTCAAAGATCTGGCACC	74.6666	122.791	99.967	0.746912	1.22832	7
	cro-novel-56	AGGATTGCTGAGTCACCATGATT	5.17557	6.26712	6.96289	0.743308	0.900074	8
	cro-novel-60	ATGATGTGACTTAATACAAGC	25.9734	55.4104	39.4692	0.658066	1.40389	7
	cro-novel-62	AATGGACTTTTTTGCCACCTCTAA	7.19311	6.43992	11.9358	0.60265	0.539546	6
	cro-novel-63	ACCTAGAATCGTCTGTAACATTC	57.1628	77.5716	91.6802	0.623503	0.846111	8
	cro-novel-65	ATGTGGGTCCGGGATTAGTGCTCC	22.6699	26.5775	31.7588	0.713815	0.836853	8
	cro-novel-70	CATATTCCCACTTGTAGACCATGT	5.19918	9.87206	8.37362	0.6209	1.17895	7
	cro-novel-72	TGGTGCACAGGAGGACGTCGTA	143.627	73.7243	148.077	0.969944	0.497877	4
	cro-novel-75	AGTGGTTGGTTAGAATCCTATATT	8.02058	9.81947	6.31827	1.26943	1.55414	2
	cro-novel-82	GAGTAAGAATCAGATGTGGACTAT	6.86338	8.06675	4.20476	1.63229	1.91848	2
	cro-novel-90	ACCGGACGTACTATATTCTTGATC	7.75554	7.01115	4.61521	1.68043	1.51914	3
	cro-novel-91	CTGGCCTTCAGTCTGCAGAGC	5.1058	7.72401	7.81417	0.653403	0.988463	8
	cro-novel-96	AATTCTGACTGGAAATTTCAACCT	7.33063	4.70377	5.12556	1.43021	0.917708	5
	cro-novel-98	TGTGTTCTCAGGTCGCCCCT	3.53162	5.2699	1.66665	2.11899	3.16196	2

## Sheet: Table S5
Table S5.
z-scores of siRNAs in the three different groups of plants showing data for the detected siRNA, ordered according to the clusters shown on Figure 6.
Small RNA	Vir	WB	NO	Cluster
AACACGTCATCGGACCACACGCCT	43.1617	33.2335	53.1325	1
AGAAGAACAATACAAGCGTCGTAC	125.337	105.11	151.32	1
AGCAACTTTACTTTGAACACGAGA	62.7522	57.5815	68.6042	1
AGGAATATGAACCTTTGAAGACGG	113.602	103.365	121.564	1
AGGGAGAACGCTGAAGAAGAGAAG	98.2084	83.1907	107.152	1
AGTCTGCAGGACCGCTGAGTCACC	131.985	107.685	166.633	1
AGTCTGTAAAGCTGCTGAGTCACC	75.2093	63.0221	95.2436	1
AGTCTGTAAGACCGCTGAATCACC	64.6458	59.4076	71.8825	1
AGTCTGTAGGACTGCTGAGTCACC	60.6002	49.893	66.4832	1
ATAAAACCCACAACATTCGACTGT	40.7143	25.6005	64.2517	1
ATGATTTACATCTTTCACTTGGGC	45.0884	40.9693	50.191	1
ATTACGGACGATTGAATATTCAGT	47.8555	44.6231	50.5405	1
ATTGATTGGTACCAACTCTGCAGT	106.754	91.9999	115.882	1
ATTTAAACTTTGATCATTGGCACC	38.7017	24.9639	55.2981	1
ATTTGAACCTTGGACCTTGGTACC	365.709	297.768	421.608	1
ATTTGAACTTTAACTCTTGGTACC	71.3004	59.0137	77.405	1
ATTTGAACTTTAGACCTTGGTACC	77.115	56.0693	93.489	1
ATTTGAATCTTGAACCTTGGTACC	83.5148	73.598	98.2751	1
ATTTTTTGTTGGAACAGTCTGCCT	60.6448	52.1382	75.2768	1
CCTGCAGACTGGAGGCCAGGACCT	107.442	93.6763	115.489	1
CGCGGGGTAGAGCAGTTTGGTAGC	47.8877	40.5081	57.2117	1
CTTGCAGACTGGAGGCCAGGACCT	39.153	29.7162	51.7351	1
TCAACGACTTTAGAAACTGAAAGT	50.2742	47.1403	51.6207	1
TTACTTTTAGAATTGTGAGTGCCT	46.0179	36.786	58.7637	1
AAACCTACCCAGATCGTCTATAAC	51.0295	45.5414	49.9228	2
AAAGACCGGATGAATCTTGAGCCT	65.1796	44.4537	68.762	2
AAGAGGGAGAACGCTGAAGAAGAG	49.5466	30.869	50.2876	2
ACAGGGAATGACACTATGAACATC	105.295	92.2121	102.869	2
ACTATTGAGACAACTCTGCAGCCT	64.7528	49.4256	68.2266	2
ACTGGACGAGAATCAGCAGACCCT	75.2284	38.5662	70.175	2
AGAGAACAGTTGTCGAGTAGAACC	275.655	145.17	293.294	2
AGAGGACTACTGAAAGACACTAGG	85.5376	62.5494	81.056	2
AGAGTACCCTGAGAATCTGAACCC	63.0121	47.8324	69.2849	2
AGATTCGGTGAACAGGAGGACTCC	50.0912	40.6824	49.8767	2
AGCCACTTTCGTAGGACTCACGAT	52.0171	29.2336	49.5291	2
AGTCTGTAGAGCTGCTGAGTCACC	56.1111	39.7668	52.432	2
ATGAGTTGAGGACAGGTAAGTATC	147.656	132.108	149.938	2
ATTCGAACCTTGGACCTTGGTACC	378.62	286.416	394.779	2
ATTCGAGTTGTAGAGGGAACGACT	57.7672	34.166	54.3725	2
ATTCTCAAAGCCTCTGAATGGACT	54.072	26.9302	46.9239	2
ATTTGAACTTTGGACCTTGGTACC	57.5282	45.9837	59.4386	2
CTACTTTTAGAACTGTGAATGCCT	59.287	57.1122	59.2541	2
TAACGGTGAGTCTGTAGAGGGATT	156.536	113.465	171.191	2
AAGGACCCTGAGGACGAAGGATTT	43.0204	54.7679	71.4148	3
AAGGACCGTTCAGTACAGCATGAC	44.8749	53.4834	79.4444	3
AATGACTGTAACGAGACCGGGCCC	32.131	36.6235	55.1326	3
ACCATTTACTTGATCACCAGGCAG	176.167	190.741	241.653	3
ACCCAGACGGAACTGATTAGCCTC	30.3709	47.2751	74.6095	3
ACCCAGTCGGTTCTGTAGTGACAC	66.9808	73.5363	101.901	3
ACGAAAACGGTGAGCGTCGGCCAC	23.413	32.2401	50.5787	3
ACTCGGAAGTTAAGATTTGACCCT	50.7186	57.3118	68.7119	3
ACTTTAGTACCAACTCTGTAGCCT	61.3439	67.1976	78.9463	3
AGAATTGTGTGGTCTGACGCCATA	67.0091	81.8146	140.505	3
AGAATTTACAGACTCAGGGACCTC	40.4568	47.7052	72.8042	3
AGACAAAGCCTCTGATACCTGAAA	26.8144	36.0414	59.3437	3
AGGGAATATACATGGTCAGATCTC	34.1996	36.7411	52.761	3
AGGTATGACCTCTGCCTCGGCCCC	28.431	33.1613	54.841	3
AGTTACTAATTCATGATCTGGCAT	255.212	340.733	586.413	3
AGTTCCAACTCTGCAGCCCCAGAA	48.6753	57.8291	107.578	3
ATACCCTGAGGATCTGAACCCGTT	39.138	46.3738	55.8075	3
ATACTTGTGTAACTCTGAGTGCCT	40.8262	43.0911	51.8135	3
ATAGATCTAGATCTGAAGGTACCC	38.4952	43.9655	52.6738	3
ATAGGACCGTACAGACAGTAAAAC	65.6393	84.021	116.46	3
ATCGCCAGACACGTTATCAGACCG	241.735	277.211	472.575	3
ATTACTACTTATAAAGACTTGGGC	59.1391	63.0484	77.1263	3
ATTCAAATGAAGATTGATCTGATT	85.2444	87.3788	95.8311	3
ATTCCAGTCTGCAGAACTACTAAC	32.6602	38.1324	51.3878	3
ATTCGTCAAAGAACACACATGCCT	51.7438	59.053	76.6804	3
ATTTAACCCTTGAACCTTGGTACC	35.7443	41.913	85.2732	3
CAGCCCTTTGTCGTTTCGATTCGT	64.9676	72.344	93.9041	3
CAGGACGTTACACTTGTATACAAG	24.0227	33.5342	50.449	3
CATCCGATCGCAGAGTTATTCATG	136.49	150.939	226.378	3
CCCGAACCCGTCGGCTGTCGGTGG	16.3658	21.0148	52.9417	3
CCGAGGACTGTATGGTGGGAGCCT	17.6159	29.2147	57.2697	3
CCGGAGATACAAATGAACAGCCTT	24.216	29.0595	60.1475	3
CCTTGGCTCTTGGACCAACTCTGC	26.7438	35.6815	64.3887	3
CGAGGACAAAATGTGTGGAACCAT	56.9177	65.9031	79.3244	3
CGAGGCCTAAGAGTTCTGTACTTT	33.0337	37.7907	74.9609	3
CTGGACAGTGGCGCTGAAGACCGC	67.2027	93.0711	139.098	3
CTTGGACCTTGATACCAACTCTGC	28.9574	36.6543	55.1377	3
GCAATTGCGAGAAGACTGTAACGG	24.1951	35.0458	63.4876	3
GGAAAAATAGCTCGACGCCAGGAT	31.8331	57.9795	195.792	3
GTCCAAGAACCGGTCGTCCGATTT	30.5359	41.0269	91.5161	3
GTCCAGAATCGTCCCGTGAAGAGC	55.4012	96.0666	175.926	3
GTGCAATTGCGAGAAGACTGTAAC	76.0086	87.3347	115.626	3
TAACACATGCAAGTCGGACGGGAA	23.2427	43.1311	93.746	3
TCAGGAGCTCTCACTTGGCATGCC	89.4518	112.231	179.185	3
TCCCGAACCCGTCGGCTGTCGGTG	11.0145	25.8035	64.0584	3
TCCGCTGTAGCACTTGGCAATTCC	386.54	457.227	735.408	3
TCCGCTGTAGCACTTGGCATTTCC	52.1445	75.5271	177.732	3
TTATATTGGATGATGTTCGGCACC	28.4801	37.3948	52.7964	3
TTGCAAGTAGAATGAAGTCATACT	71.3388	76.9255	89.2669	3
TTGGGACTTCTCACTTGGCATACC	48.1585	58.5207	80.9229	3
AAAAGGAGAATAGAGTCTGAGACT	52.8363	55.0938	75.0524	4
AAAGGTCGACGCGGGCTCTGCCCG	37.0307	36.6278	66.643	4
AACCAAGCAGCTCTGAACTGTCCT	209.831	201.522	272.121	4
AAGACTTGGTGAGAGATCTGGCCT	105.294	101.004	245.43	4
AATACGAGGATGCAGAACAGGATG	45.0368	36.6296	73.1797	4
AATCAGATTGTCCGACGTTCAAGT	44.59	45.0418	52.4391	4
AATTCCTCATAGATTAGTCGCTGA	56.7517	57.5514	84.7613	4
ACAACCAACTCTGTGGAGCAGCCT	60.509	47.9076	126.639	4
ACAGAATTCATTGACGCGGACGTC	69.7208	62.8261	95.7198	4
ACCAATCATCGTGTCGCTGTGGCA	77.7782	65.0088	111.062	4
ACTCAGGAGCTCTCACTTGGCATG	56.4428	54.7122	68.4739	4
ACTCTGCAGTCTCAAAACCAACTG	42.8955	39.2265	56.6145	4
AGACCCGGGCTGATTATAACGACA	58.6753	54.3592	77.7963	4
AGACTGAGAGTCAAAGAACCACTT	54.19	51.1715	130.556	4
AGGAATCAGAGGGCACAAGACCTT	60.151	50.392	99.8067	4
AGGACCGTACAGACAGTAAAACTC	59.4156	58.82	72.8581	4
AGTAGATTGTTAGACTGAAAGCCT	55.0291	47.9859	70.8994	4
AGTGGATGTAGCTCTTTGAGAGAG	56.5226	56.3267	57.382	4
ATAGGACCGTTGAATTACCATGAC	45.541	41.6019	56.6515	4
ATATAAATCGTTAGAAACTCGCCT	52.5388	54.2193	67.2451	4
ATCCTATGTCGGTCTAAACCTACT	62.9303	53.3312	81.5346	4
ATGGCCATTGTAGAATTCACAAAA	33.7432	35.2413	59.0621	4
ATGGTCGGAGAATAGAAGTTCAAC	45.1754	42.4409	69.4498	4
ATTAAACGATCGCCTGATAAGAGG	44.1002	42.0852	52.4553	4
ATTATTTGTTAGAACAGTCTGCCT	42.9013	36.89	60.8391	4
ATTATTTGTTGGAACAGTCTGCCT	698.442	600.841	902.872	4
ATTCGAATTGAAGACCTCTCACTT	48.3096	46.7791	58.9124	4
ATTTGAACATTGAACCTTGGTATC	233.133	228.382	299.584	4
ATTTGAACTTTAGATCTTGGTACC	46.5657	42.332	70.0423	4
CACCAATCGTCATTAAGTTAGAAT	55.9523	57.8729	73.3315	4
CATAATATCGTAATTGCAGAGCCT	61.9977	65.059	93.6059	4
CCTAACAGACCGGCAGACTTGAAC	403.248	385.833	992.416	4
CGGGACCAGATGAACACAAAGAAT	40.0519	37.654	60.4984	4
CTAACAGACCGGCAGACTTGAACT	51.342	55.8734	156.029	4
GAAGAATTCCTAGGACTGCAGCTT	79.7833	84.9343	140.088	4
TCACACGAGACTGGCTCTGATACC	58.1072	56.1708	84.2127	4
TCACGGGACGATTCTGGACGGAAT	34.7305	32.8876	52.109	4
TCAGCGGTCCTGCAGACTGGAGGC	48.5401	47.0041	65.0001	4
TTACGAGATTGTCTGACGCTTAGC	57.8509	55.0241	76.9396	4
TTCTGATGGTCCCGGGCTGATCAT	35.7027	36.3464	56.3824	4
TTTGAGAACTTTCAGATACGGCCT	97.0835	79.2053	150.195	4
AAGACTCAGGACTGTTATTACAGC	109.915	90.5862	78.8496	5
AATTAGCCGATGTGGGATTCTCAA	50.5062	45.8493	37.4706	5
AGAGATGTAGAAACCTAAGGAGGG	144.304	110.717	82.7294	5
ATATTCCATTTGAACGTCAGACAG	51.6614	45.2237	40.0765	5
ATTCCATTTGAGCGTCGAGCAGTC	81.5451	72.3327	56.3292	5
CGCCGTCGTCTCGATCGTGGAGGG	77.9974	57.1193	33.1802	5
TTTGTTCGGGCAACATCTTTCACC	446.618	408.842	327.869	5
AAACCTGGCTCTGGCTCTGATACC	69.1674	59.6934	64.7724	6
AAGTATCGGACAGTCTAATGGGAC	97.6486	74.4492	86.6957	6
AATATGGCGATCGGCTAGTATGGC	53.113	47.0018	49.8796	6
ACGCAATCGATCATCGGATTAGAT	50.2767	32.6904	43.7599	6
ACTGAGATCGTAACTAAACCGACT	51.8951	31.7992	39.4529	6
AGAAATCAAATGTCAAGTCGTACT	53.8045	25.5782	35.874	6
AGAATAACAAGGATTTTAGAACCC	230.325	139.378	174.305	6
AGAGGATTATTAGAACCACTGTCT	94.0247	80.4546	90.1053	6
AGGAATGGAACTGTAGCTCACCGT	63.4874	50.2929	59.3138	6
AGGGTACCCTGAGAGTCTGAACCC	86.5663	81.1064	84.6253	6
AGGGTATTCTGAGGGTCTGAACCT	123.955	99.4128	108.634	6
AGTGGATGTAACTCTTTGAGAGAG	110.736	99.2836	106.339	6
ATACGCTGAGAACAATAACAAGAC	51.7924	31.0848	41.7255	6
ATATCAGAAGAGAAGTTTGAACCT	55.572	32.1706	41.3312	6
ATGGATTGGAGGTGAGTAGGTACC	51.0025	31.0428	43.3662	6
ATTAGCCGATGTGGGATTCTCAAC	123.548	106.703	118.319	6
ATTCCTTGGGTCTGGAAATGGACT	101.372	66.8706	89.4678	6
ATTTGAACCTTGAACCTTGGTACC	277.256	182.566	217.567	6
CAGAGGGCATAAGGTCTGTAGACC	67.4644	54.1994	60.5357	6
GAGTCAATTGGTCTTAGGGCATAT	67.2388	52.791	59.2362	6
TAGTTCTAATCGTTTCGCGACAAT	56.1851	40.0037	48.4545	6
AAAAGATCGGTCAACAGTAATTGT	63.2839	58.9604	59.3008	7
AACCCAACAACTGGCTCTGACACC	109.541	92.3385	94.1047	7
AAGAATTGTAACACTGAATGAGGT	95.197	63.9533	59.1767	7
AAGGACGAGGTAGATATACAATCT	56.2772	41.3837	41.1846	7
AAGTATTTGAACATTGAACCTTGG	71.4795	48.4635	50.1958	7
AATGGATGTCAAGACTCATACGCT	52.0178	33.572	38.4493	7
ACAGAGATTGTCGATGTTGATGAT	79.4812	56.1429	54.115	7
AGAATGCCTGTAAAGTCTGACTCT	120.428	95.0495	100.944	7
AGAGACTGTTGACACTTAAAAGAG	91.9374	53.0913	64.4954	7
AGGAACTACAGAATTCTAGAGCCT	66.1175	48.2487	43.3328	7
AGGAGAGATCAAAGGACTAAGACT	87.6504	82.0304	82.8517	7
AGGAGCCTGAAGTCTGGATTGACT	58.6578	42.1771	44.4714	7
AGTGAATGTAGCTCTATTGAGAGA	73.6135	62.5743	61.1552	7
AGTGGATGTAGCTCTATTGAGAGA	157.291	130.229	125.554	7
ATATTCCACCTGGACGTTGGACAG	54.7446	35.5385	40.9525	7
ATCCTCTATTTGTACGTCGGATAG	92.6371	67.1562	66.8057	7
ATGGATAGAGAATGTATTAAGAGA	101.377	82.3459	87.9424	7
ATTAGATTGTTAGAAGTTGGCCCC	63.1126	53.9121	54.6575	7
ATTCAGGATTAAGATCTAGCGCCT	101.682	77.7732	77.1896	7
GCCGGCCGGGGGACGGACTGGGAA	95.3949	87.1597	84.8964	7
TTAAGTGACTCAAACTCAAAACCT	57.9618	34.6125	39.7041	7
AAGAGAATCGGAGACTTGAAGCCT	27.8819	56.0689	23.9077	8
ACTAACGCAAATAGAACTTGAACC	47.7353	50.7145	47.1073	8
AGAGAAGAATAATGTAGAATGCTT	52.3833	61.7203	50.0317	8
AGCTTCTTAGAGGGACTACGGCCT	51.7801	63.7773	47.2073	8
AGGATTATAAGGTTTTAGGACTTT	137.96	161.705	135.551	8
ATCCGGACGTAACACTTTAACTGC	37.9183	53.9738	33.8942	8
ATGTCATGAACTTGTACTTGGACC	30.2106	53.9562	23.764	8
CCGCCGTCCGAATTGTAGCCTGGA	70.211	312.924	82.9013	8
CGGGCTTGGCAGAATCAGCGGGGA	282.45	639.544	202.499	8
CGGTGGACTGCTCGAGCTGCTCCC	75.3103	93.8863	69.5547	8
CTAGAACTCGAGAAAGACTGTACC	35.7005	58.6206	37.2928	8
GGTGAAGTGTTCGGATCGCGGCGA	172.491	622.328	196.102	8
TAACAACAAGAGCCTACGGTCTGT	38.7897	51.344	34.3128	8
TCCGCTGTAGCACTTGGCATTTCA	71.9889	173.423	71.2409	8
TGACCTGTAGATAACGCACAATGA	44.7288	62.3629	44.9104	8
AATAGATTCAGACAGTAGCAAAAC	81.477	81.2605	72.8002	9
ACGTAGAATTCTAACCATTTTAAC	54.0334	67.1083	40.595	9
AGATAACATGACTTTGGACTGCCT	106.299	127.479	94.9156	9
AGCAACTGATGGAACCTGTAATAG	51.3269	64.2241	40.8905	9
AGGACTAGAGATTTACACAAGTGG	148.181	148.482	126.882	9
AGGTGAGAGATTCTGAATTCGAGT	54.0073	60.2606	49.756	9
ATACAAGATTTGAACTCCAAACCT	53.3652	52.6281	31.0679	9
ATCCGATCGTAGAGTTATTCATGT	69.0527	78.8537	57.3321	9
ATTGATCTTCAGATTGGCGAAACC	44.517	53.8285	28.726	9
CGCCGTCCGAATTGTAGCCTGGAG	74.1799	147.593	45.947	9
CGGTGAGTCTGTAGAGGGATTAGC	47.8056	52.7345	37.2761	9
GAAGAATTTGTAGAAGAAAATATC	62.5566	94.7049	43.3313	9
GAATGAAACTATAAAAGGACTAAG	64.1726	70.4348	40.0566	9
GATGATGGAACTTTGGTCCAGCCT	103.724	151.01	68.8319	9
GCCGTCGTCTCGATCGTGGAGGGA	38.0267	53.3989	31.054	9
GTCTAGTCTCCAATCTGTAGAGCC	48.924	51.832	46.7154	9
TACGAAGAGACAAGGACTGGATCT	48.1762	50.9346	46.4942	9
AACATGATATCAGAACCAGAGCCT	28.6079	47.4271	52.778	10
AACGGGCTGTTAGCTTCTAGACAC	7.26011	48.5934	73.114	10
AACTGGCGCCGAACTGTAGATAAC	87.6277	107.82	107.271	10
AAGGAACCATTCTGACATTACAGT	31.3436	66.7269	69.5508	10
AATTTAGAAGTAGACGCTTGCGCC	51.8461	70.9484	90.1896	10
ACCTGAGGATTGATATGAACCAAT	21.7617	45.2484	74.034	10
AGACCGCATGTCAGATTTGAACTG	38.9398	53.0062	58.8509	10
AGAGAACGTATGACTGAATAAAGT	35.4959	60.0311	64.2353	10
AGAGAGACTCTAAACAGCACGAGC	56.3107	91.6656	94.5992	10
AGATGGACCCGGACTGATTATAAC	30.3237	58.6074	79.0689	10
AGTACGGAGAGTGGAACACAAAGT	39.242	46.5803	53.4472	10
AGTATTGGACCACACAACTCTTGT	43.0501	65.0258	65.4915	10
ATCGGTCCCTTAAGAATTCTTCAA	15.1109	41.6348	51.4216	10
ATGAGACAGAAAACATAAGATTGT	32.1515	52.6865	54.2493	10
ATGGACCCGGACTGATTATAACAA	37.3626	52.4651	62.5317	10
ATTACAACTTATAAAGACTTGGGC	111.113	156.354	193.911	10
ATTCGAACCTTGGCTCTTGGGACC	35.877	58.6008	67.3454	10
ATTGTCCCTGCCAGAATTTGAATC	25.716	44.6102	52.3027	10
CATCCGGTCTTGAGTGAGAACTTT	43.9996	61.6524	74.7333	10
CATTTGAATCTTGAACCTTGGTAC	58.0433	59.3043	59.3945	10
CCATCAGTCGCAGTCGTTGTGATC	36.9744	52.1445	52.7874	10
CCCAATGACTGACTCTGATATCAT	58.5178	82.572	86.6474	10
CCTGACATTAAACTCCCTTTGGCC	69.818	79.7744	85.0813	10
CGGAGAATTTGAAGAACAAATGCT	40.2023	96.9036	128.702	10
CGGTATCAGAGATCAAGAACAGCT	38.0658	77.3861	125.449	10
CGGTTGTTGAGGGCCCCTTGCACT	9.06889	30.7204	50.6098	10
CTACTTTTATAACTGTGAGTGCCT	18.0937	44.1976	69.0982	10
CTCAACAGACTGGAGGCCAGGCAC	16.599	32.4532	56.3684	10
CTCCAACTCGTGTCAGGACGTAGC	29.487	54.1408	56.956	10
CTCGGGAATATGAATGTATAGCAC	39.3728	62.995	66.6066	10
CTGGCGCCGAACTGTAGATAACGC	80.361	112.766	116.308	10
CTGGCTCTGATACCATGTTAAGAA	23.0432	41.7633	50.9106	10
CTGTTAGAAATTCAATGAGTCAAT	32.1654	64.7506	82.5438	10
CTTAAAATGACTAGAACTCGAGAA	235.742	402.215	501.691	10
CTTCCAAAGTGACTCAAACTCAAT	74.5885	142.448	151.997	10
GAGAATAGCTTGGTTGGTTAAGAC	35.7223	89.5516	107.207	10
GAGAATATCAGCAGGCTGAAGATC	57.9335	141.956	169.014	10
GAGGATCCTGTAGATGAAGAATTT	59.1911	88.8183	109.686	10
TAGAATTAAGATACTTTGTAGCCT	48.89	92.4026	109.42	10
TATCACTTGATTGTCAATTGCAAG	40.8975	48.2236	54.1124	10
TCGAGATACGGTCCTGTATAACAC	46.216	64.655	64.2735	10
TCGTAGAACACTTGAATAAATCAG	85.0086	101.365	100.809	10
TGACTCTTGGACCAACTCTGCAGT	39.0838	76.7698	106.01	10
TGCCAAATTGATGATCTAGAGATT	17.9981	46.1244	67.6162	10
TGGACCCGGACTGATTATAACAAC	24.1366	45.3238	60.5008	10
TTAGACCGACATAGGATTCTCTGT	59.8655	77.9415	83.9987	10
TTCCAGTATACAATATCGTTGAGC	14.7453	33.2249	54.0091	10
TTTAAATTTTATACCCGCGGACCC	34.4715	59.1793	80.3695	10
TTTCCAGTTGGATGAACAGATCGC	62.3424	78.155	81.1198	10
TTTGTAGGTATTAGATGGCACACC	43.9319	67.7748	84.234	10
AAAACAGCTCTGATCGTCAAGTGC	92.1174	115.652	110.823	11
AAGGATGAGAACCAACTATGTAGC	51.8734	96.8858	82.0867	11
AAGTAGAGACATGAACCGGATTCA	86.2751	113.769	108.903	11
AAGTGAGAAATTAAGTCGGTGGAC	92.1649	130.484	120.37	11
ACCAGAAACGAACAATGAACAAGC	79.5272	92.8465	91.5102	11
ACGAGAACTGGAACATGAGATAGC	48.3597	73.7914	66.6315	11
ACTAGAACTACTGATGACTGGCCT	68.7461	81.5427	72.2	11
ACTAGAACTCGAGAAAGACTGTAC	56.7555	151.798	97.425	11
ACTCATAAAAATGACTGTTGGCCT	80.4062	88.5226	87.2735	11
ACTCCCGACAAGCCCATGTGATGA	9.3439	58.0096	48.9909	11
AGATTGTGTCCAGATTCGTTGAAC	56.9255	100.527	73.1802	11
AGGGGGGAACCAGTTGCTGGCACC	46.246	124.143	99.2874	11
AGTGGATGTAACTCTTTGAGGGAG	60.7628	74.62	72.268	11
AGTGTTGGACAGTCTGATAAAGAC	83.9107	94.6834	87.8686	11
ATAACAGATGATCGTTAAAGAATC	34.8264	55.2657	37.9545	11
ATAGACGAAATTCTGGCAAAATTT	28.262	51.4301	37.3205	11
ATCCGATCGCAGAGTTATTCATGT	85.2572	125.504	99.8313	11
ATCCTAAAGTGACTGTAAGTACTT	69.5113	83.181	76.2718	11
ATCCTTGGTACCAACTCTGCACCC	37.6667	68.0609	61.3969	11
ATCGAGAAATGCATTGTGAACATC	45.8643	56.6166	52.577	11
ATGTTCAGACAATGGAACCAGCCT	40.5724	52.8759	44.7853	11
ATTACCAGGGATGAAGTAGAAAAC	138.331	170.665	161.571	11
CAACAACTGGCTCTGATACCATGT	91.9367	185.999	172.749	11
CAGAATTTCGTCTATAAAATGATG	38.1138	66.4685	42.776	11
CATTTGAACCTTGGACCTTGGTAC	97.5836	117.623	110.722	11
CGTCGCGAGAAGTCCACTGAACCT	112.045	271.387	134.799	11
CTCGGGAATATGAATGTATAGCGC	65.3718	106.298	101.549	11
CTGGACAACCTCTGAGCAAAGAGT	40.7022	50.4319	48.7322	11
GAAACGGACATCTGATCGCAGAGT	85.3255	97.7828	89.2618	11
GACTCTGTAGAATGAAGGTTTTGC	201.719	448.359	280.054	11
GGTGTGCACCGGTCGTCTTGTCCC	95.0282	119.311	100.43	11
GTACCTTTTGGGGTGAGTTAGGCC	82.4743	102.062	91.3052	11
GTGGATGTAGCTCTTTGAGAGAGT	41.3462	53.9411	43.9881	11
TAGAACTGGAGAATGAATTAGAGT	34.8556	56.9493	54.3189	11
TCCCAGTCCCGAACCCGTCGGCTG	46.0536	162.568	83.8419	11
TCGAGTATTTAGAACGCACCTAGC	39.1366	62.85	54.7302	11
TCTACTGAACATATTCTTGGCTCC	53.6938	102.006	86.5205	11
TCTTAAAATGACTAGAACTCGAGA	81.4954	214.284	132.405	11
TCTTCCATCAGTCGCAGTCGTTGT	23.9959	55.7122	52.8333	11
TGCATCTGACTGTTCTAAAAGCCT	201.193	358.67	325.364	11

## Sheet: Table S6
Table S6.
Sequences of the primers used for RT-qPCR or Northern blot hybridization
Organism	target gene/miRNA	Primer Name	Primer Sequence (5'-3')	Reference*
Aster yellows phytoplasma	chromosomal replication initiator protein DnaA	AYP_dnaA_F	AGCTGGTCTTATGGTCGATATTC	This study
		AYP_dnaA_R	TAAAGCTCCTTCCATTTCGCG
	Replicative DNA helicase DnaB	AYP_dnaB_F	CTCCAAACTTTTCGCAATCCC	This study
		AYP_dnaB_R	AAGTAACTTCACCCACTTCGC
Catharanthus roseus	Elongation Factor 1-alpha	CrEF1_alpha_F	GAAAGGTTTGAGAAGGAGGCG	This study
		CrEF1_alpha_R	TAAAGTCACGATGTCCAGGGG
	UBQ11	UBQ11F	GGAAGGCATTCCACCAGACCA	Wei, 2010
		UBQ11R	TACCTCCCCGGAGACGAAGC
	ORCA2	ORCA2F	GAAGATGCGGCATTAGCTTT	Peebles et al., 2009
		ORCA2R	TTGAGGACGAAGATGACACG
	ORCA3	ORCA3F	CGGGATCCGAAATACAGAAA
		ORCA3R	GCCCTTATACCGGTTCCAAT
	CR1	CR1F	GCTGCACTCAGGTTCAGAGG	Liu et al., 2017
		CR1R	GCAAGAGAGGCAAGGCATTT
	CSD2	CSD2F	ACTTCTCACGCCCAAAACAC	This study
		CSD2R	CCTTCCATTCATTCATTCGCC
	MYB 33	MYBTFF	TAACGCTTGCCCATCTTCCC	This study
		MYBTFR	TCGTCACAGAAGCATCGACA
conservative miRNAs, the main miRNA in several plants	miR156		GTGCTCACTCTCTTCTGTCA	Valoczy et al., 2006; Varallyay et al., 2008; Varallyay et al., 2010
	miR157		GTGCTCTCTATCTTCTGTCAA
	miR159		TAGAGCTCCCTTCAATCCAAA
	miR166		GGGGAATGAAGCCTGGTCCGA
	miR167		TAGATCATGCTGGCAGCTTCA
	miR168		TTCCCGACCTGCACCAAGCGA
	miR171		GATATTGGCGCGGCTCAATCA
	miR172		ATGCAGCATCATCAAGATTCT
	miR319		GGGAGCTCCCTTCAGTCCAA
	miR390		GGCGCTATCCCTCCTGAGCTT
	miR396		CAGTTCAAGAAAGCTGTGGAA
	miR398		AAGGGGTGACCTGAGAACACA
References:
Wei, S. Methyl jasmonic acid induced expression pattern of terpenoid indole alkaloid pathway genes in Catharanthus roseus seedlings. Plant Growth Regul 61, 243–251 (2010). https://doi.org/10.1007
Peebles, C.A.; Hughes, E.H.; Shanks, J.V.; San, K.Y. Transcriptional response of the terpenoid indole alkaloid pathway to the overexpression of ORCA3 along with jasmonic acid elicitation of Catharanthus roseus hairy roots over time. Metabolic Engineering 2009, 11, 76-86
Liu, J.; Gao, F.; Ren, J.; Lu, X.; Ren, G.; Wang, R. A novel ap2/erf transcription factor cr1 regulates the accumulation of vindoline and serpentine in Catharanthus roseus. Frontiers in Plant Science 2017, 8, 2082
Válóczi, A.; Várallyay, É.; Kauppinen, S.; Burgyán, J.; Havelda, Z. Spatio-temporal accumulation of micrornas is highly coordinated in developing plant tissues. The Plant Journal 2006, 47, 140-151.https://doi.org/10.1111/j.1365-313X.2006.02766.x
Várallyay, E.; Burgyán, J.; Havelda, Z. MicroRNA detection by northern blotting using locked nucleic acid probes. Nature Protocols 2008, 3, 190-196
Várallyay, E.; Válóczi, A.; Agyi, A.; Burgyán, J.; Havelda, Z. Plant virus-mediated induction of mir168 is associated with repression of argonaute1 accumulation. The EMBO Journal 2010, 29, 3507-3519
